# Supplementary material
Source: ML conference proceedings conference paper supplement (https://openreview.net/forum?id=HnfOGI8oql9)

Randomized-DIANA with Random Sparsification,  $q = 0.1$

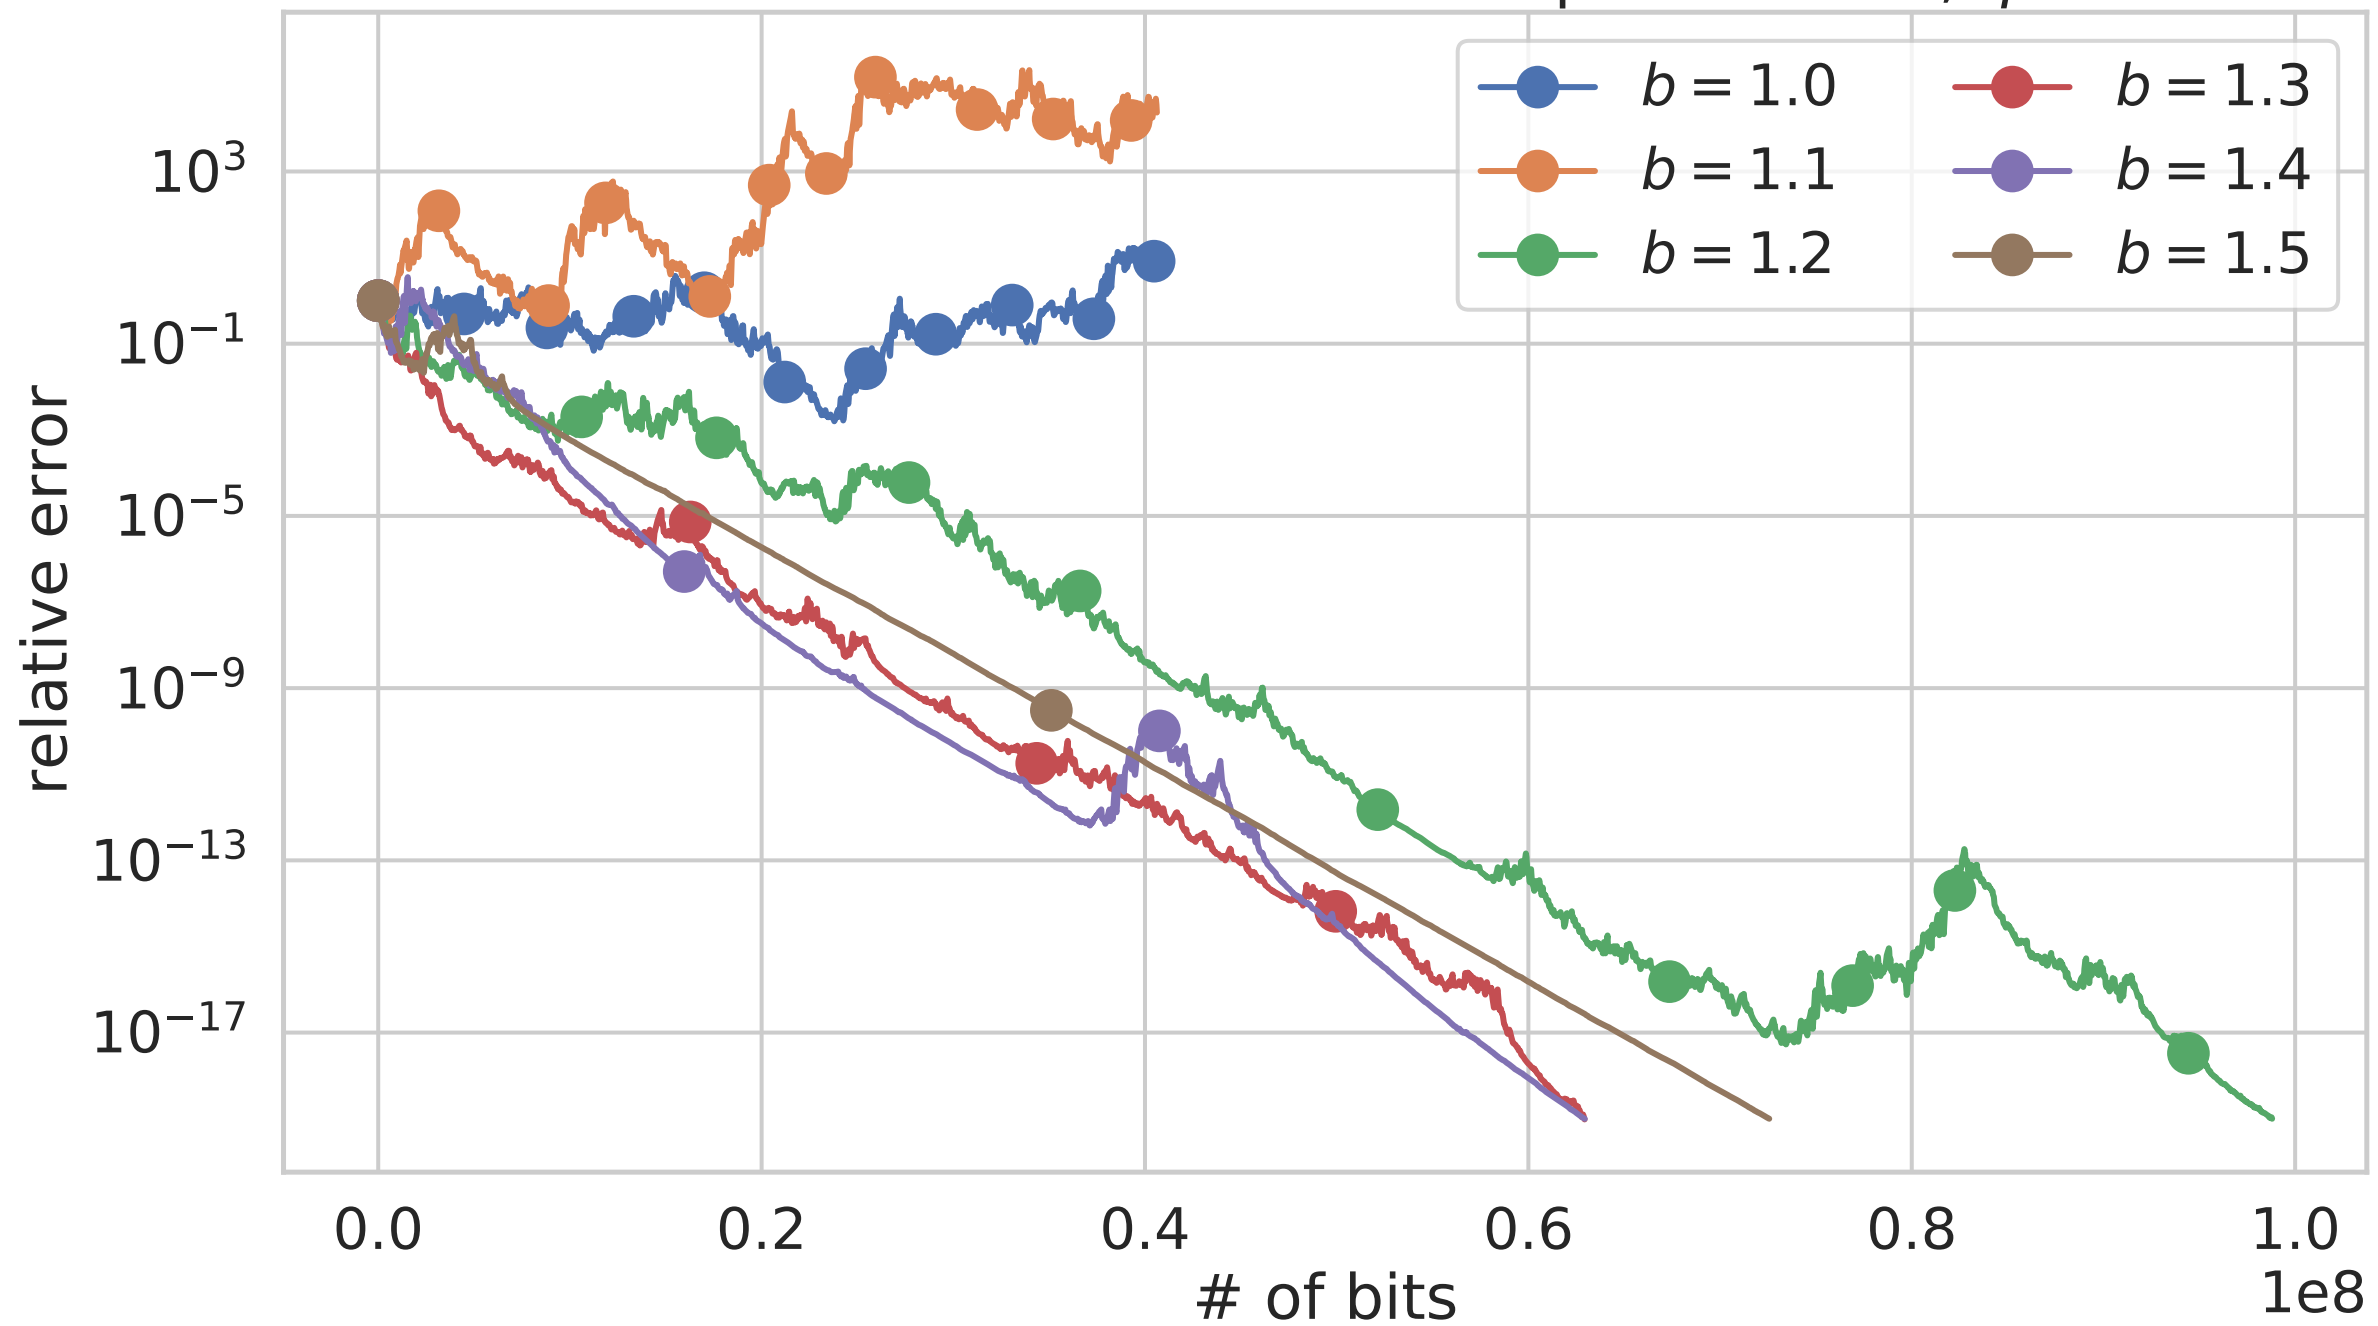

Supplement: supplementary_material [file attachment]

Random Sparsification

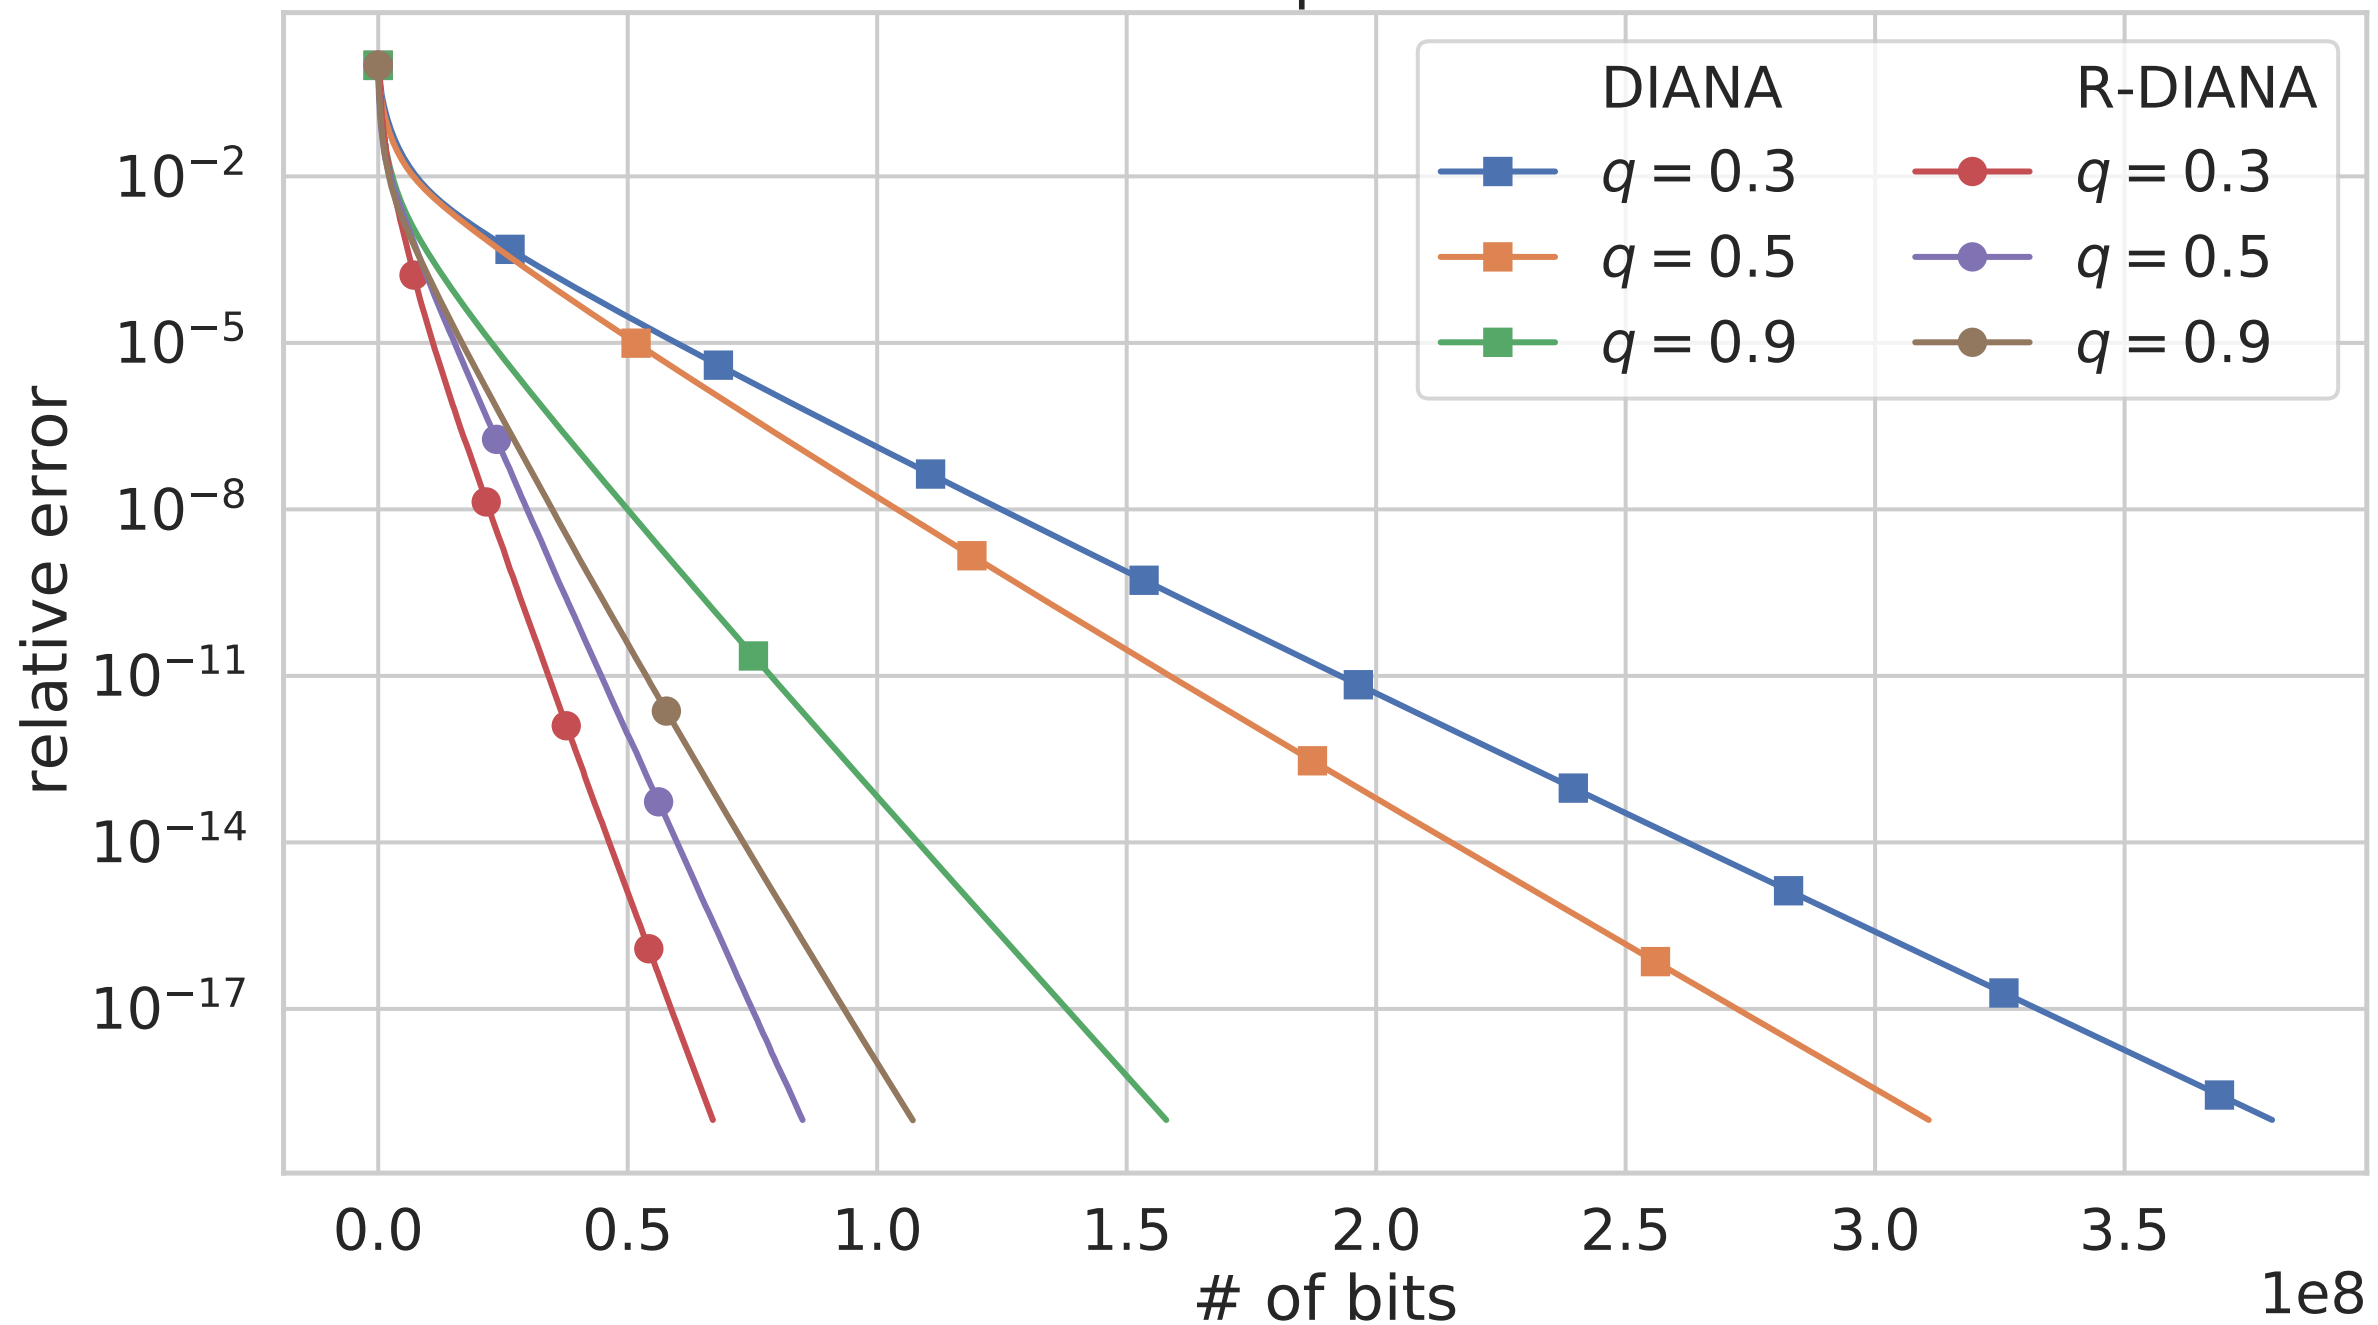

Supplement: supplementary_material [file attachment]

# Natural Dithering

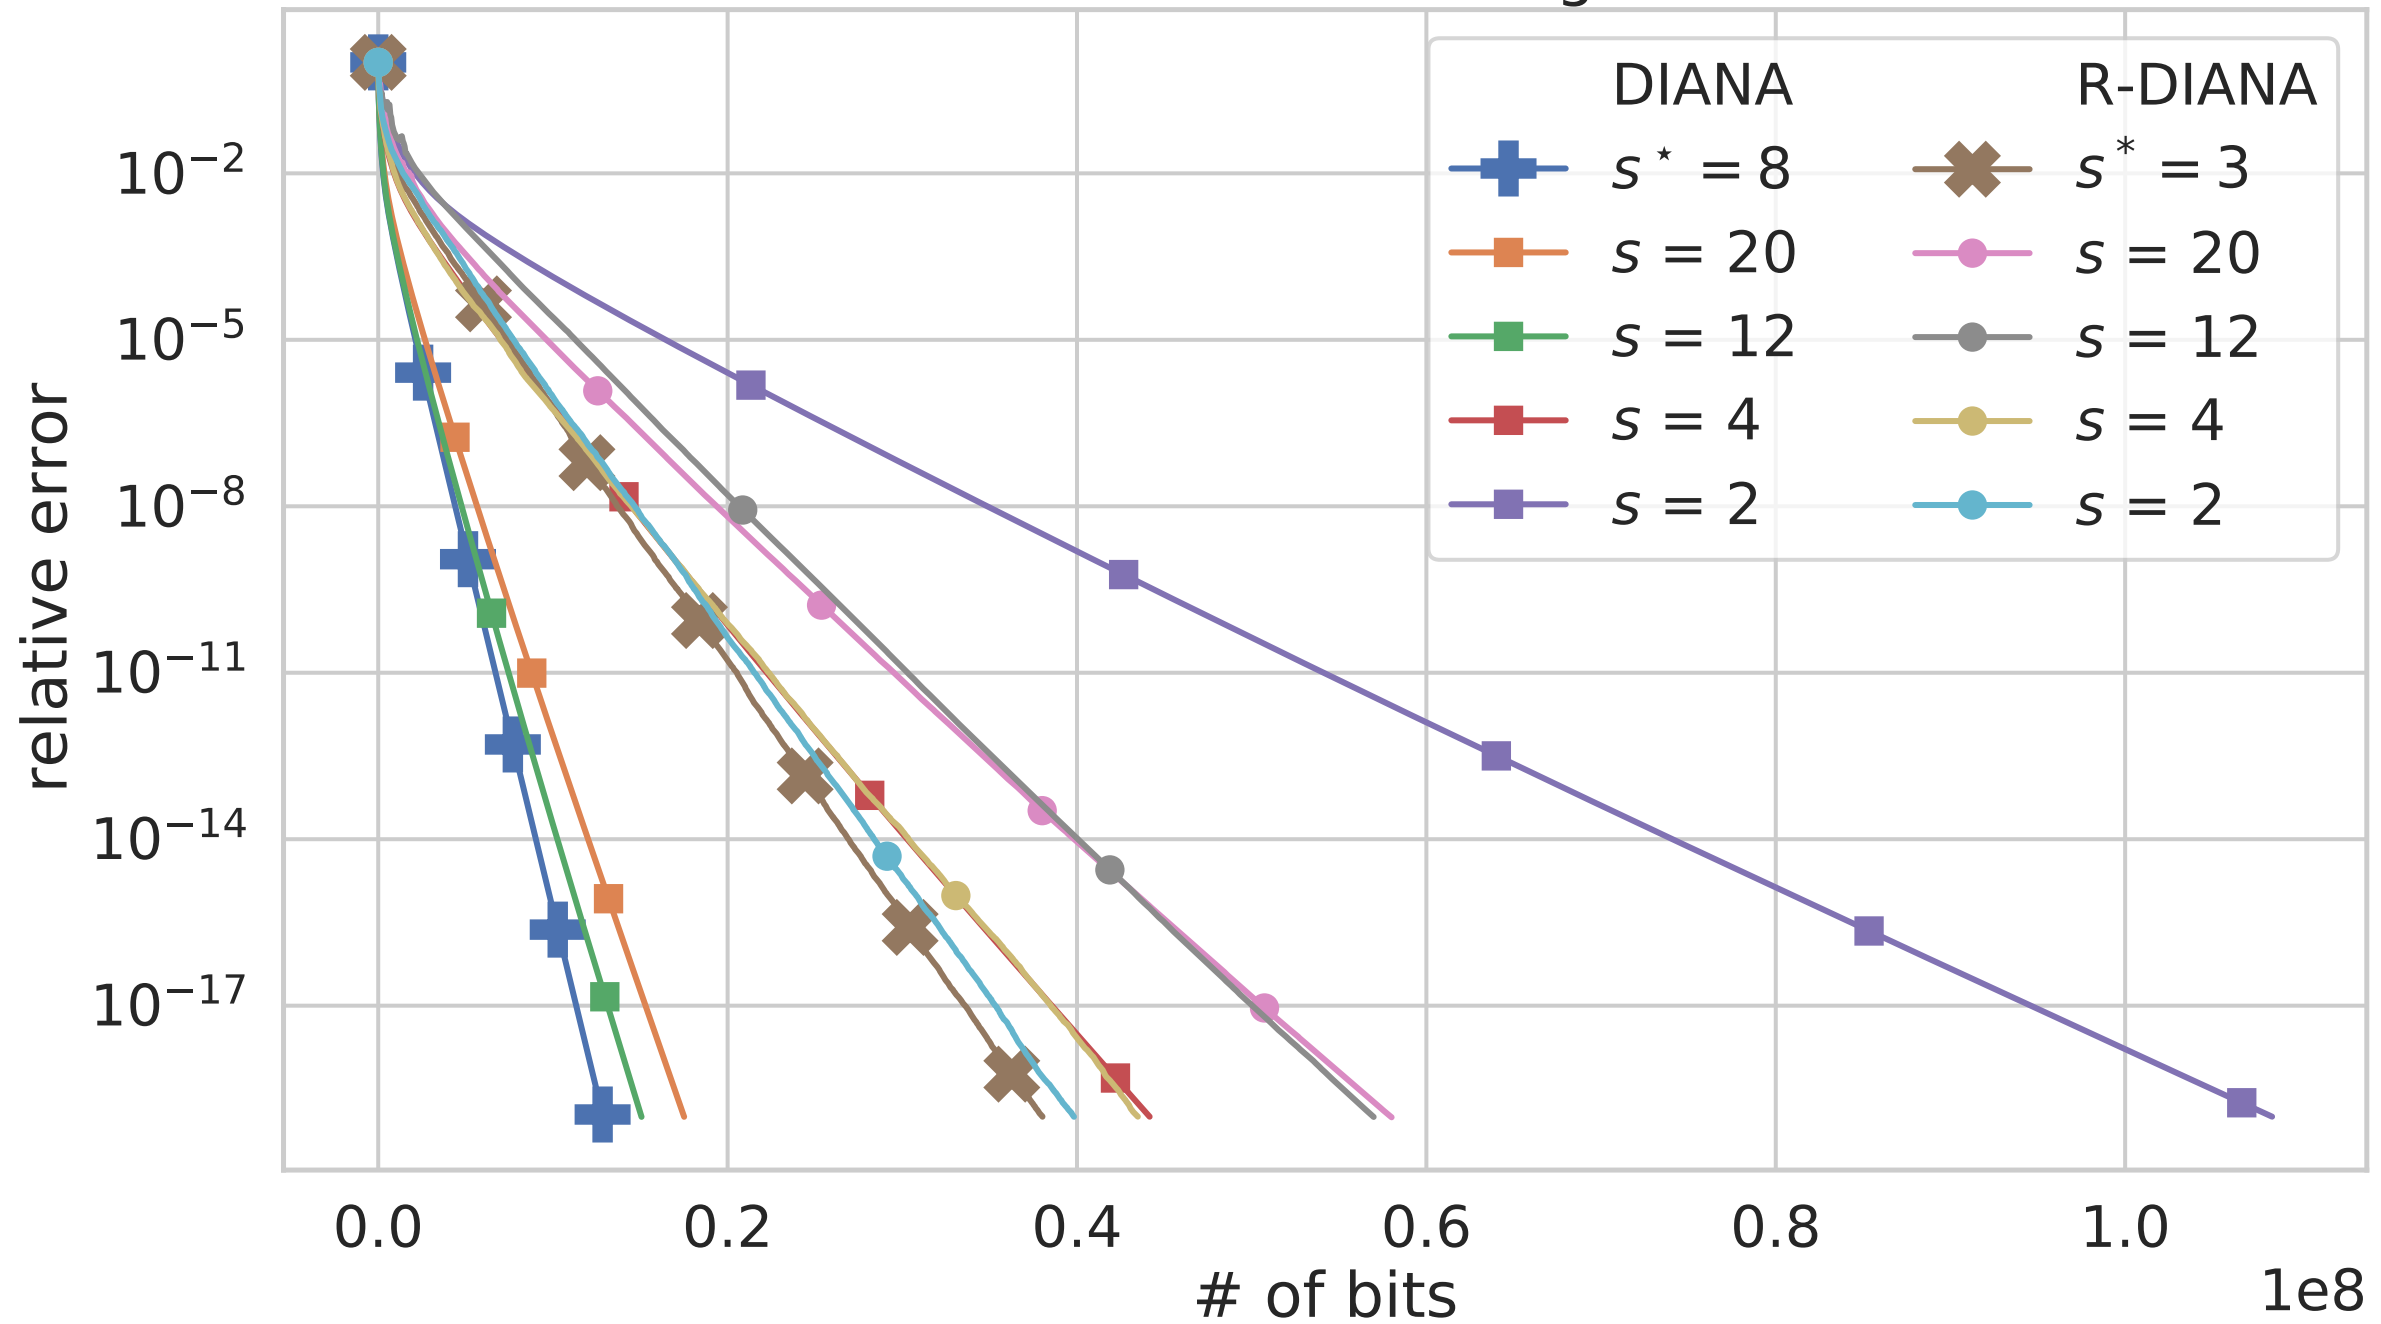

Supplement: supplementary_material [file attachment]

(Averaged runs) Rand-DIANA with Rand-K,  $q = 0.1$

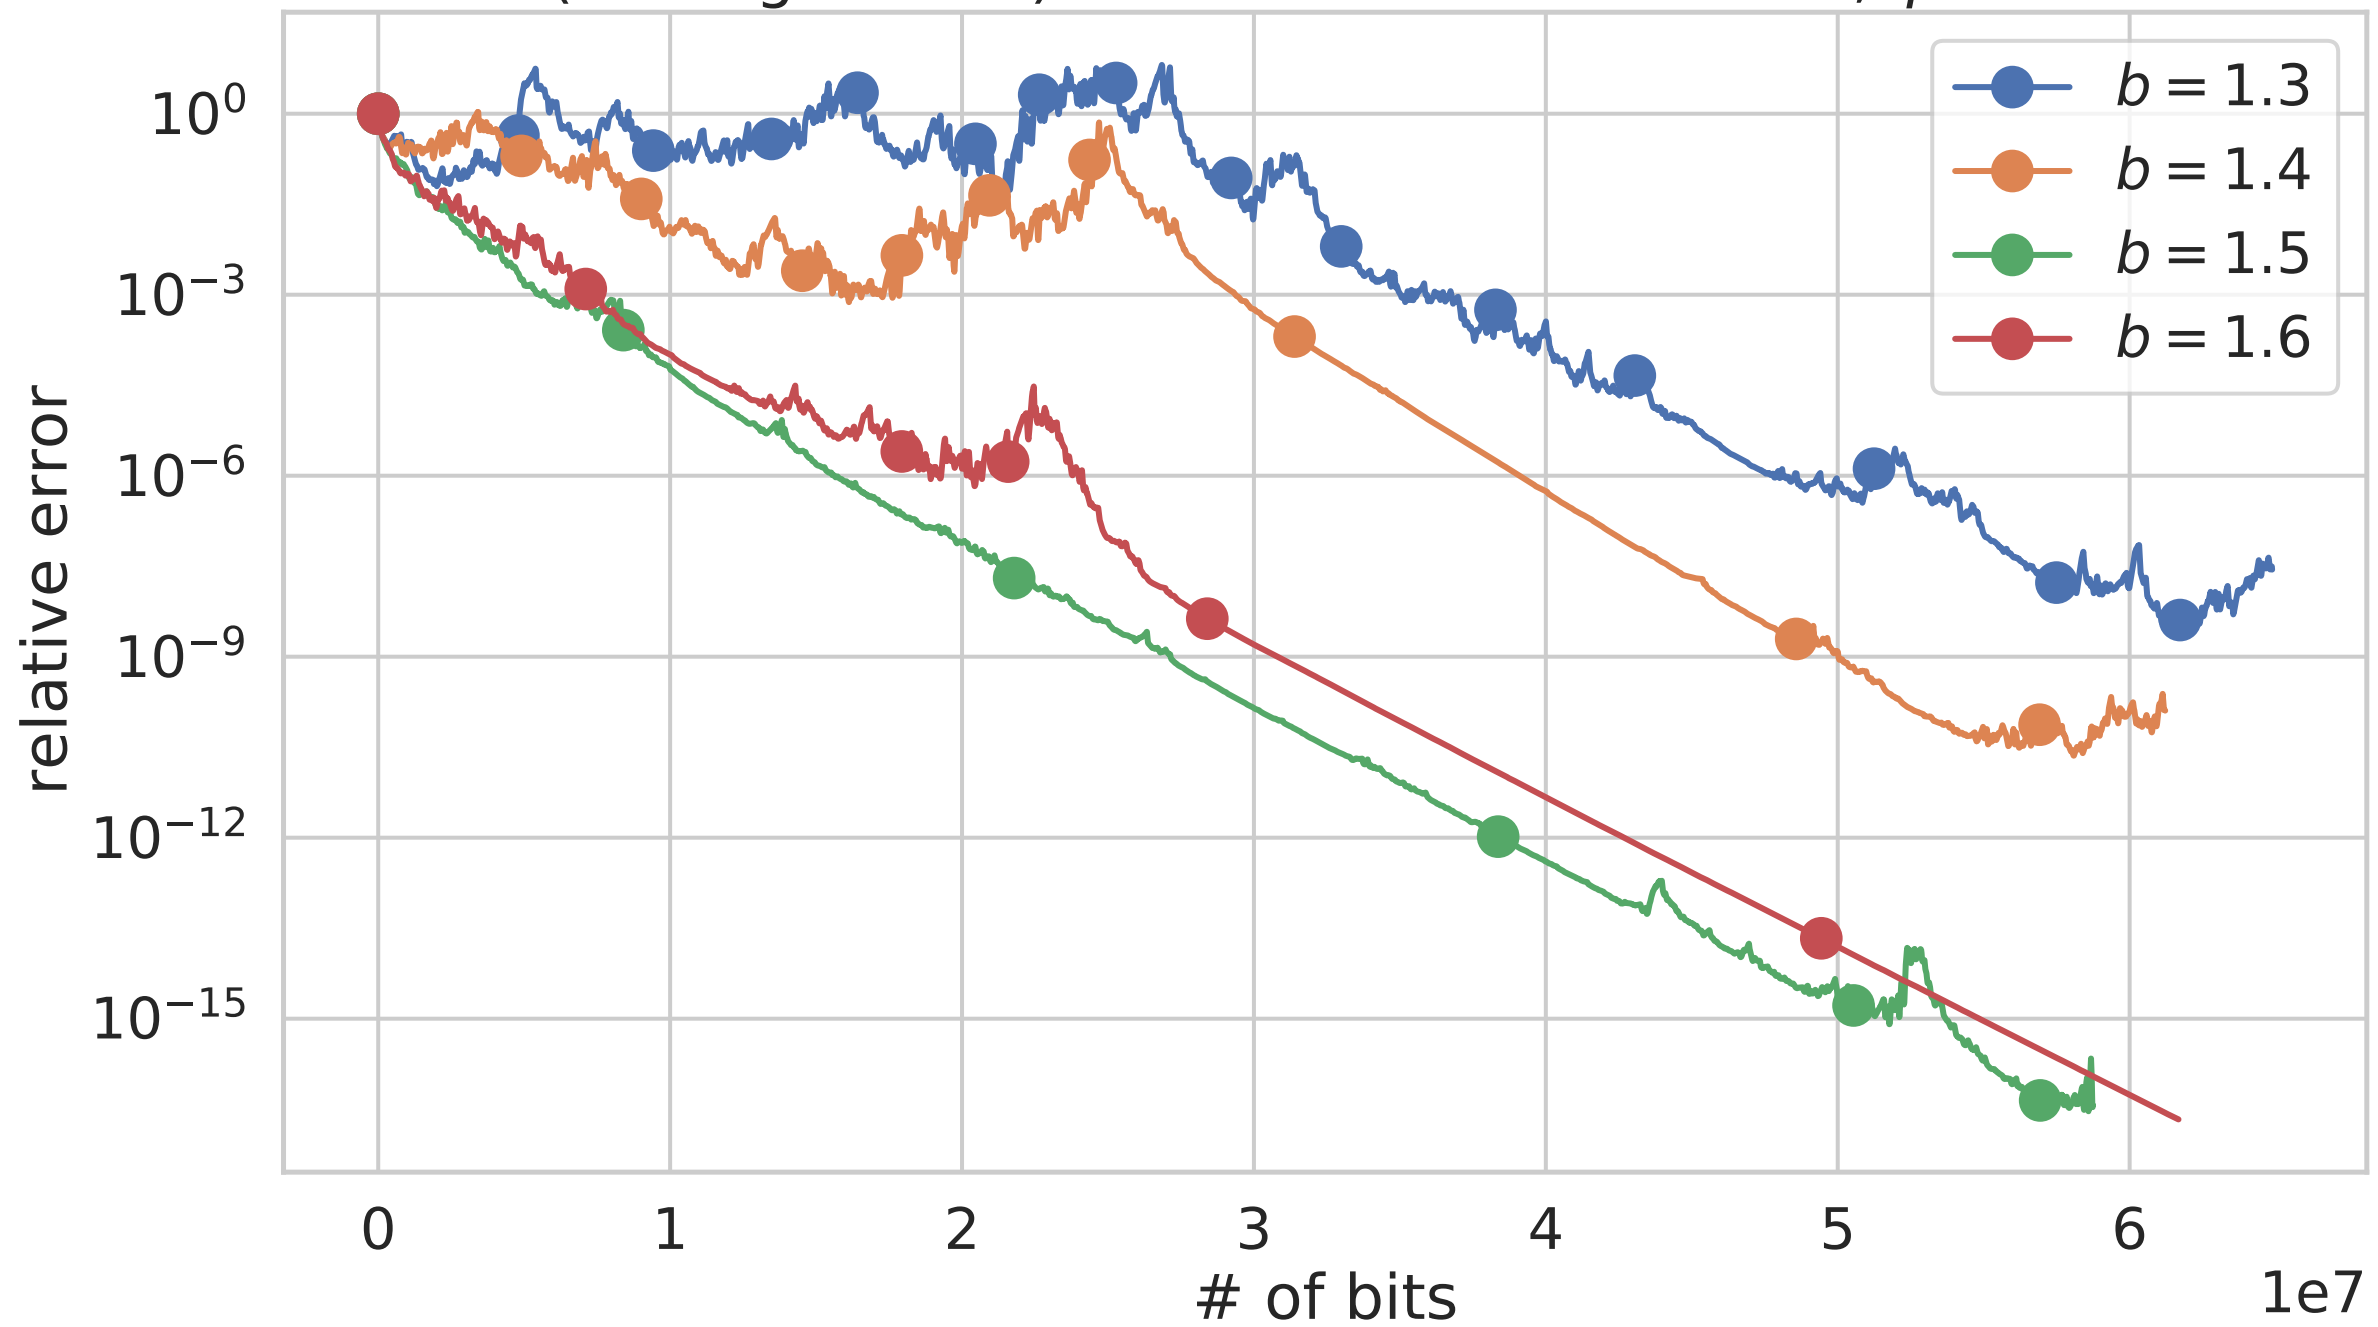

Supplement: supplementary_material [file attachment]

Random Sparsification

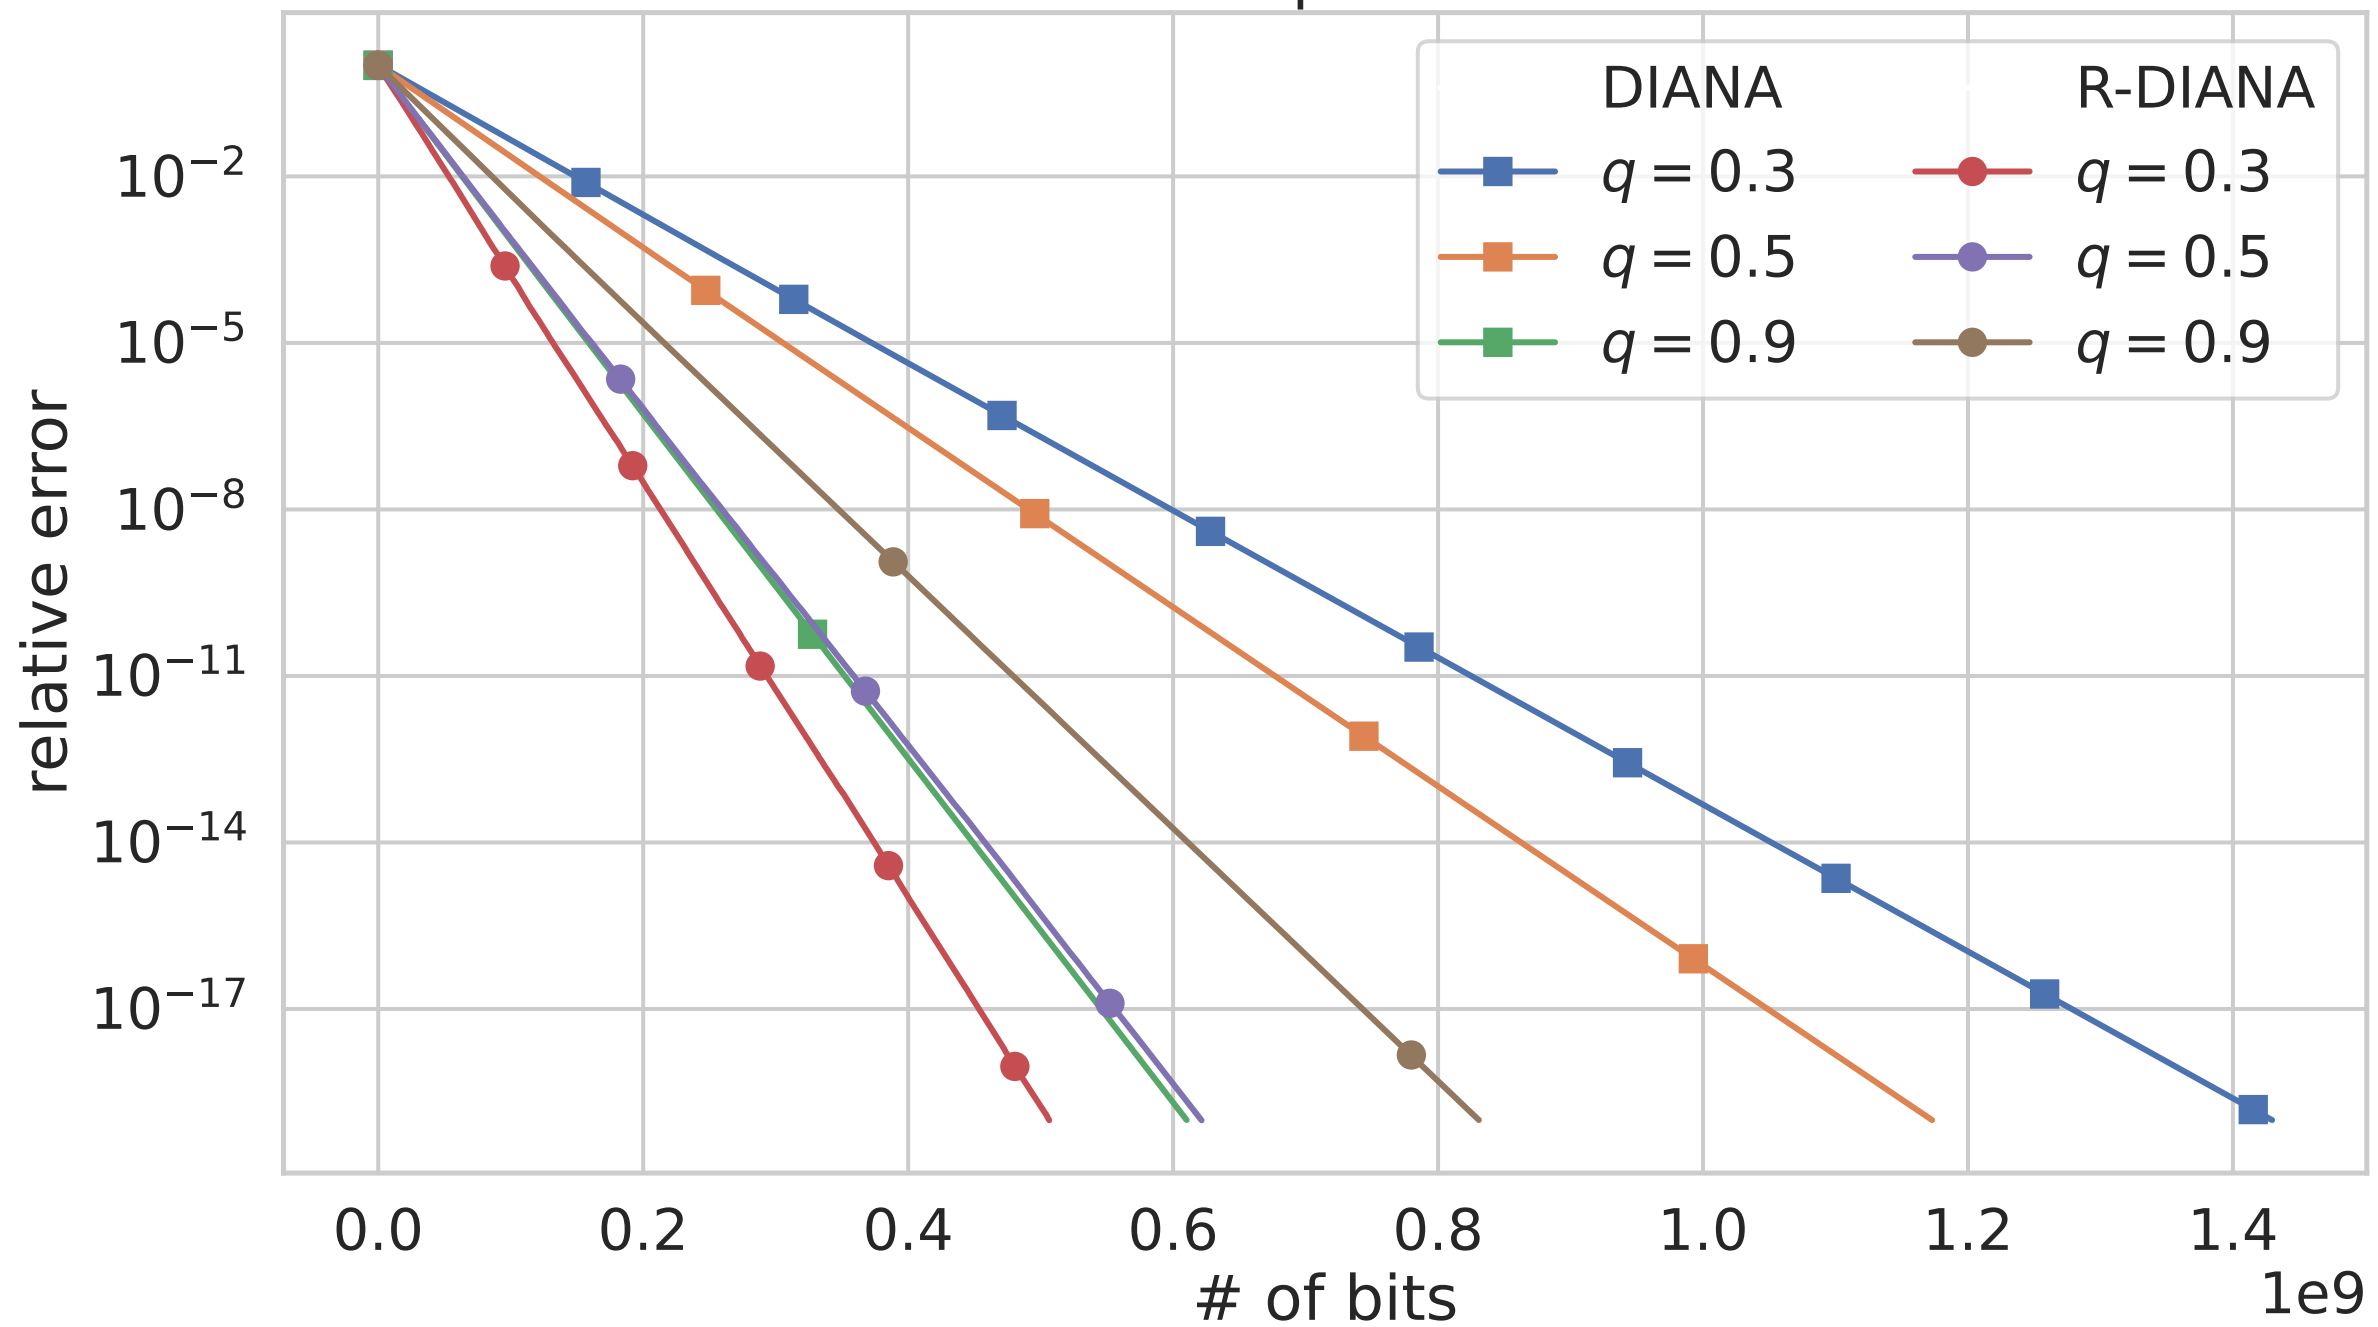

Supplement: supplementary_material [file attachment]

Random Sparsification,  $q = 0.8$

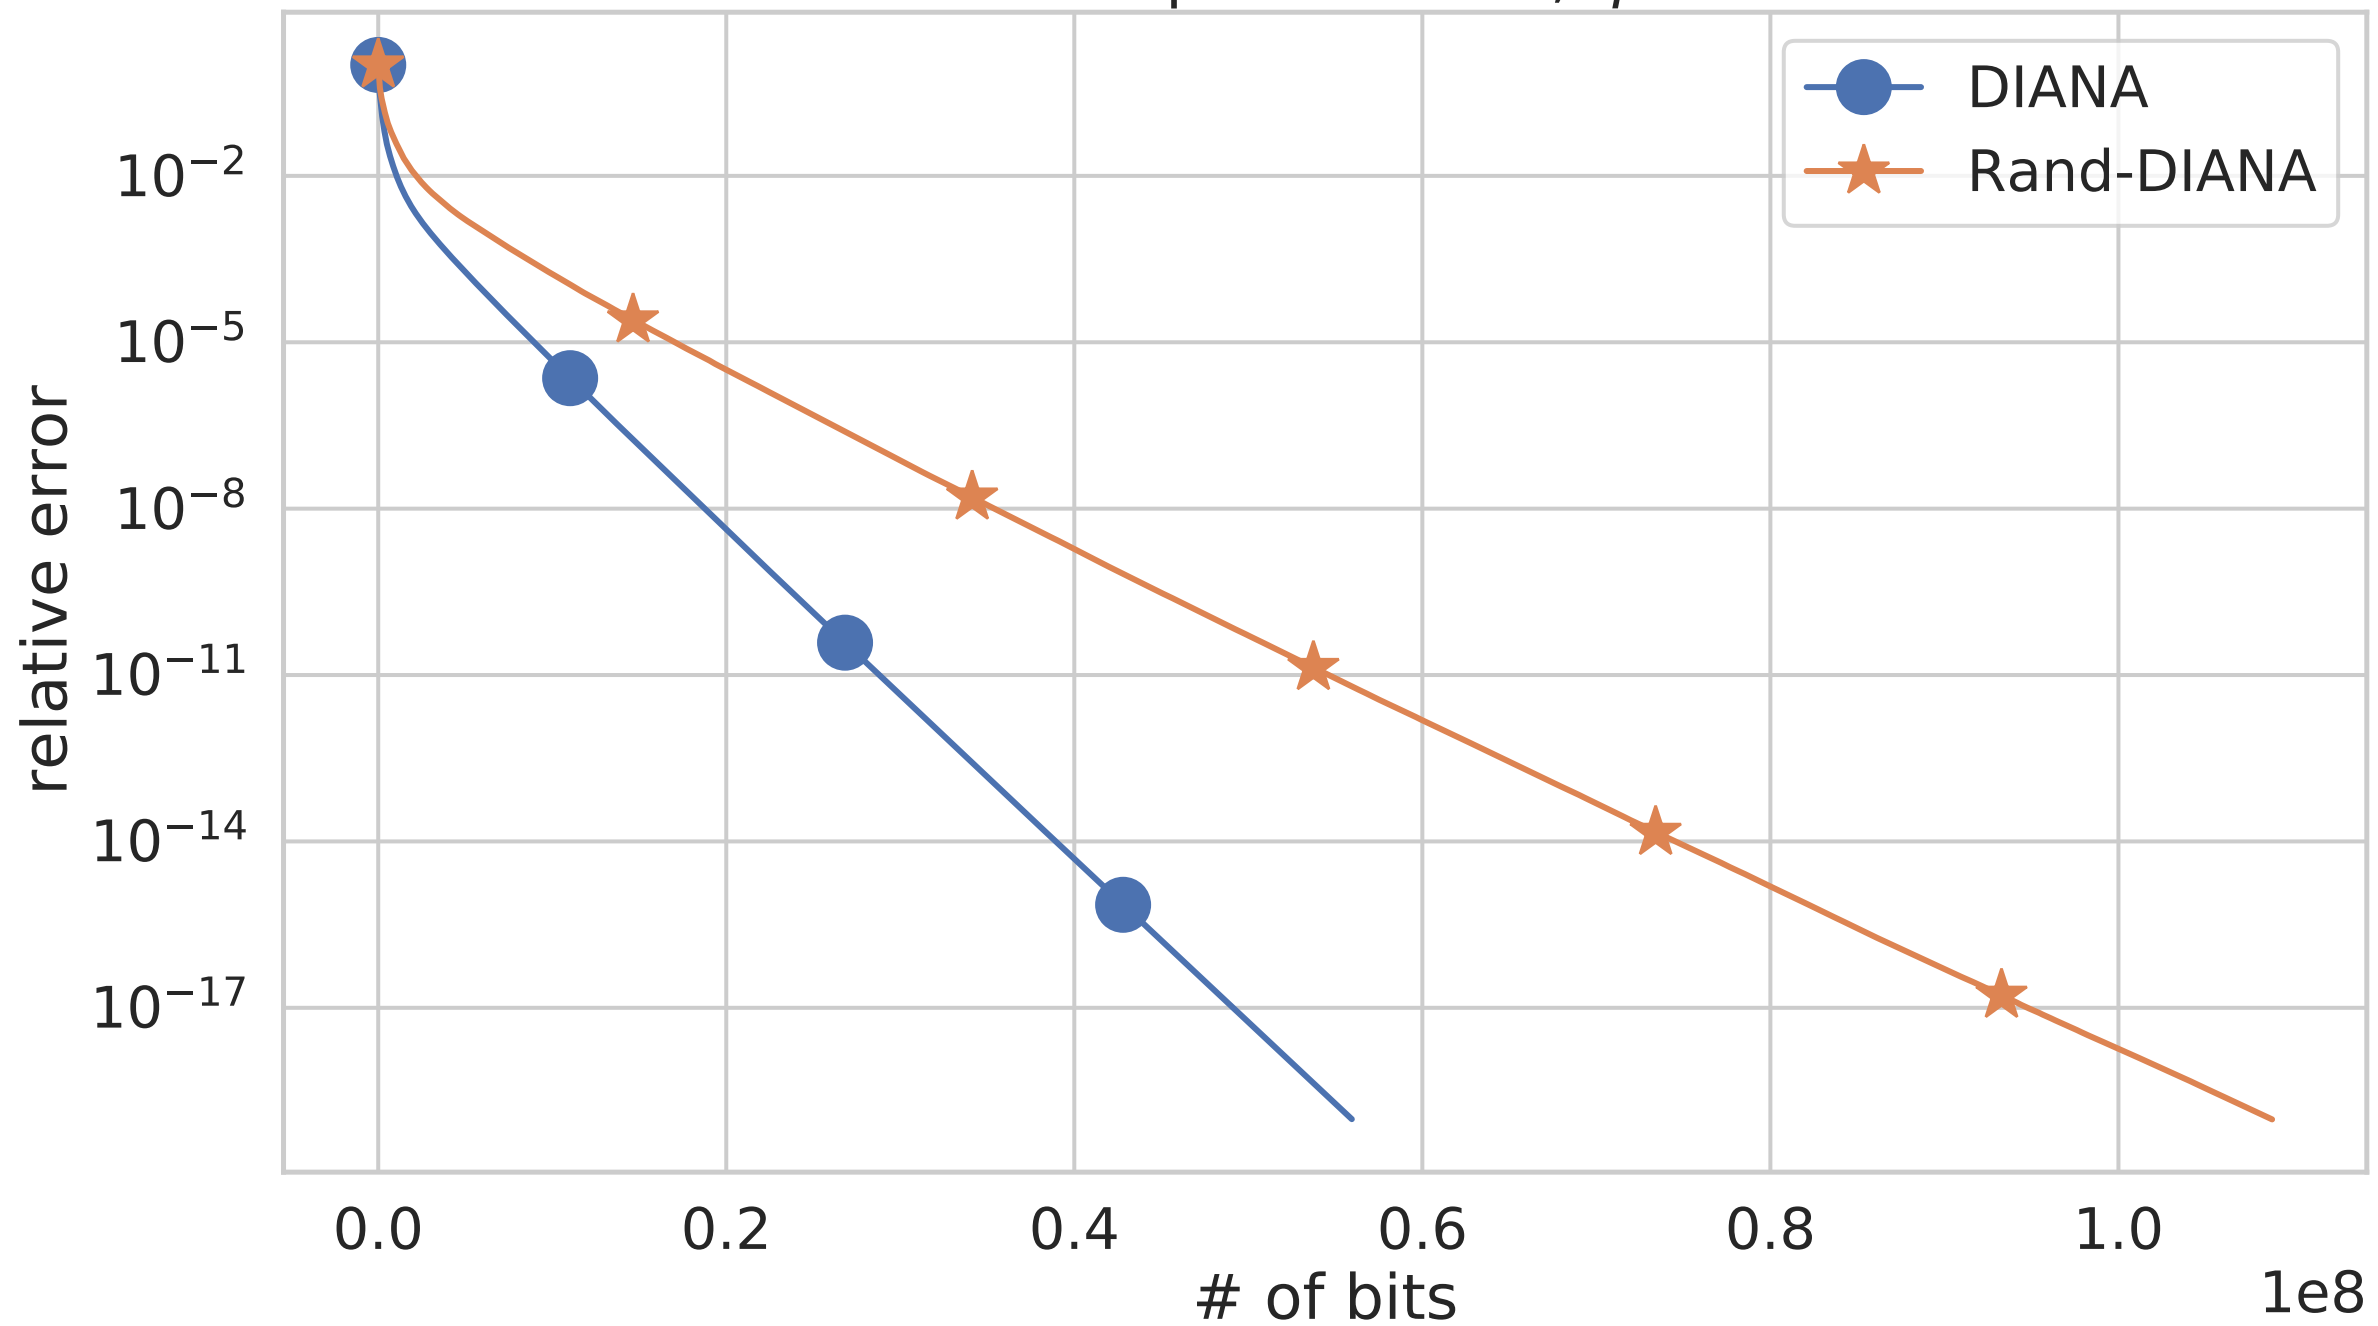

Supplement: supplementary_material [file attachment]

Randomized-DIANA with Rand-K,  $q = 0.5$ 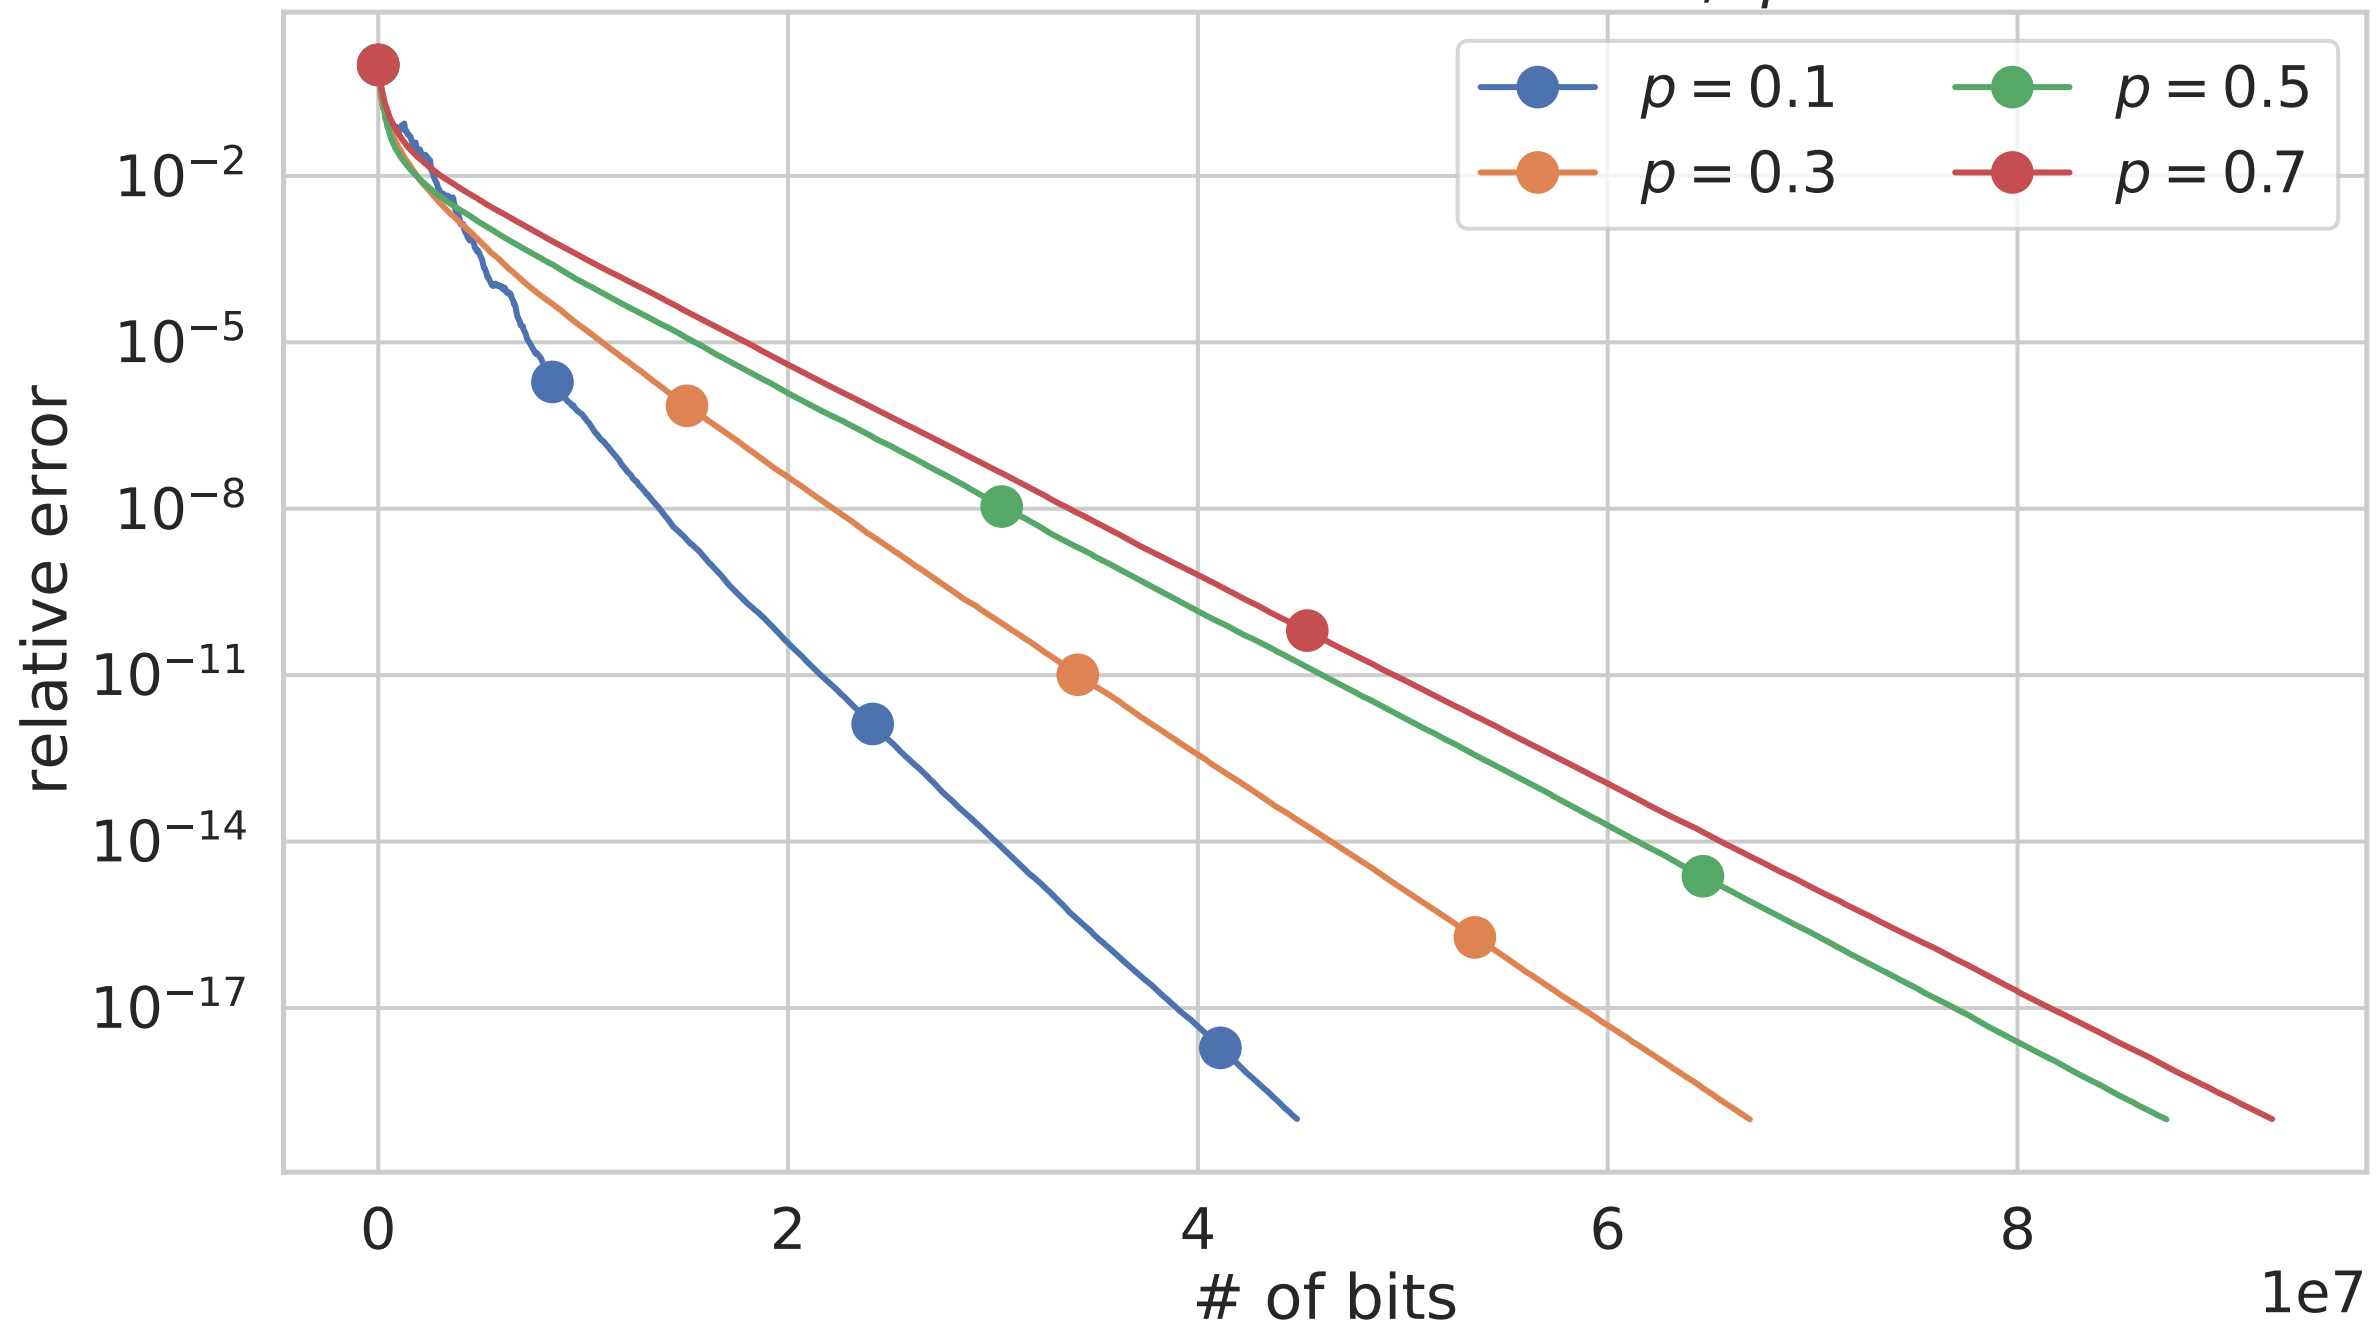

Supplement: supplementary_material [file attachment]

# Natural Dithering

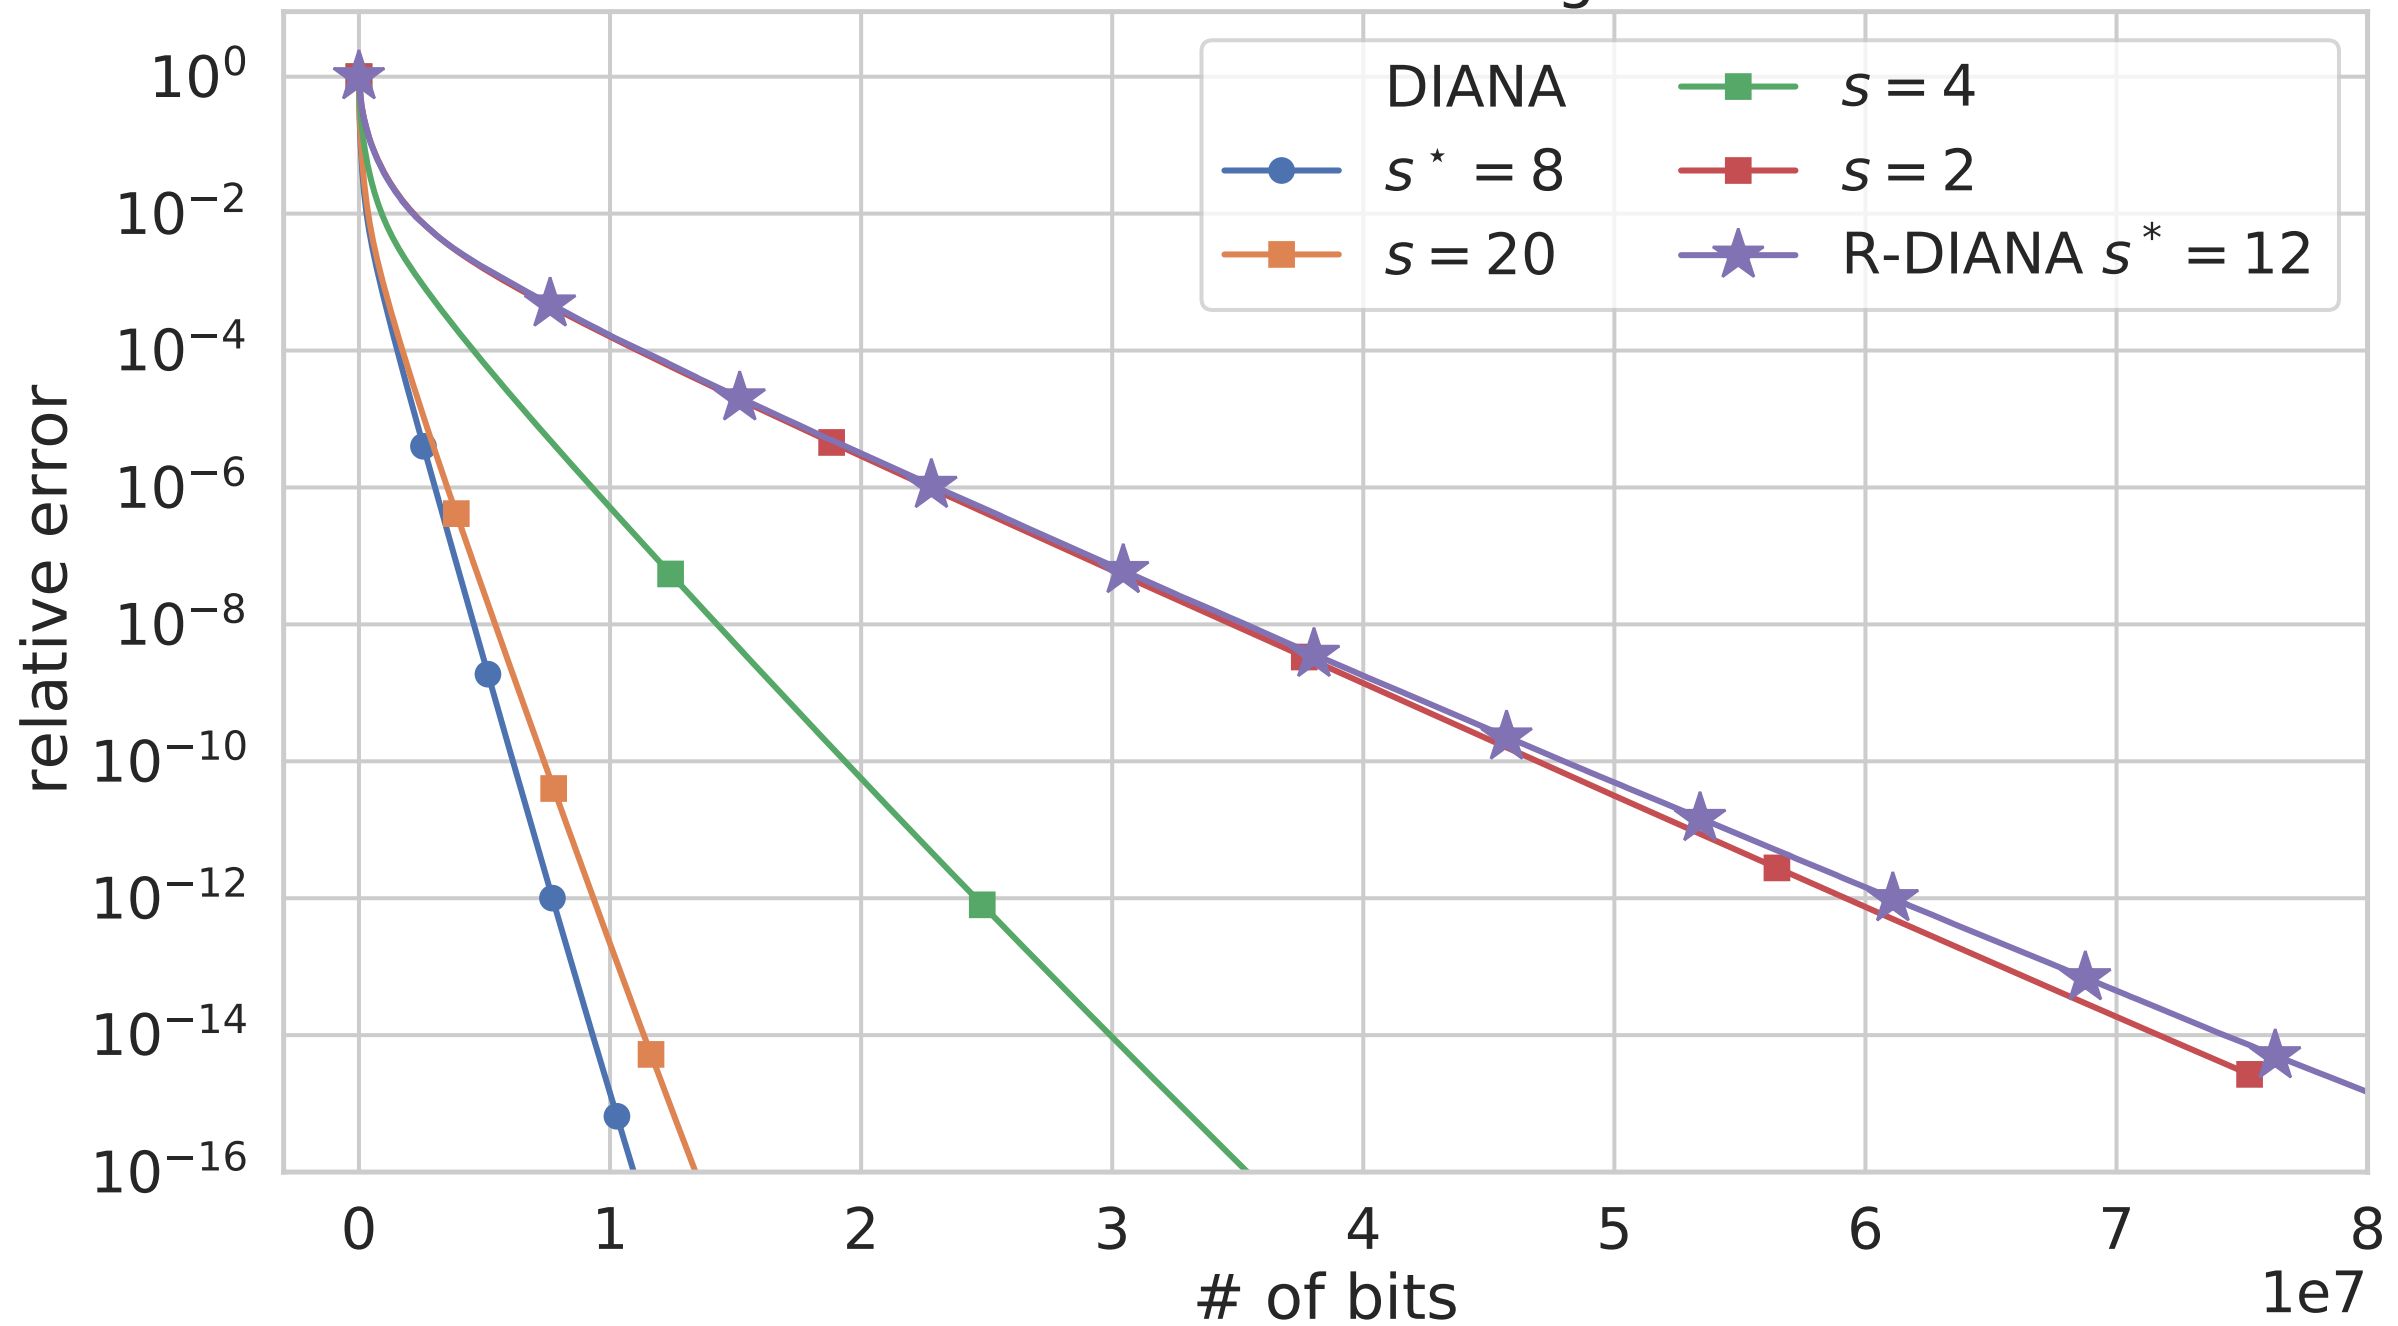

Supplement: supplementary_material [file attachment]

Randomized-DIANA with Rand-K,  $q = 0.7$ 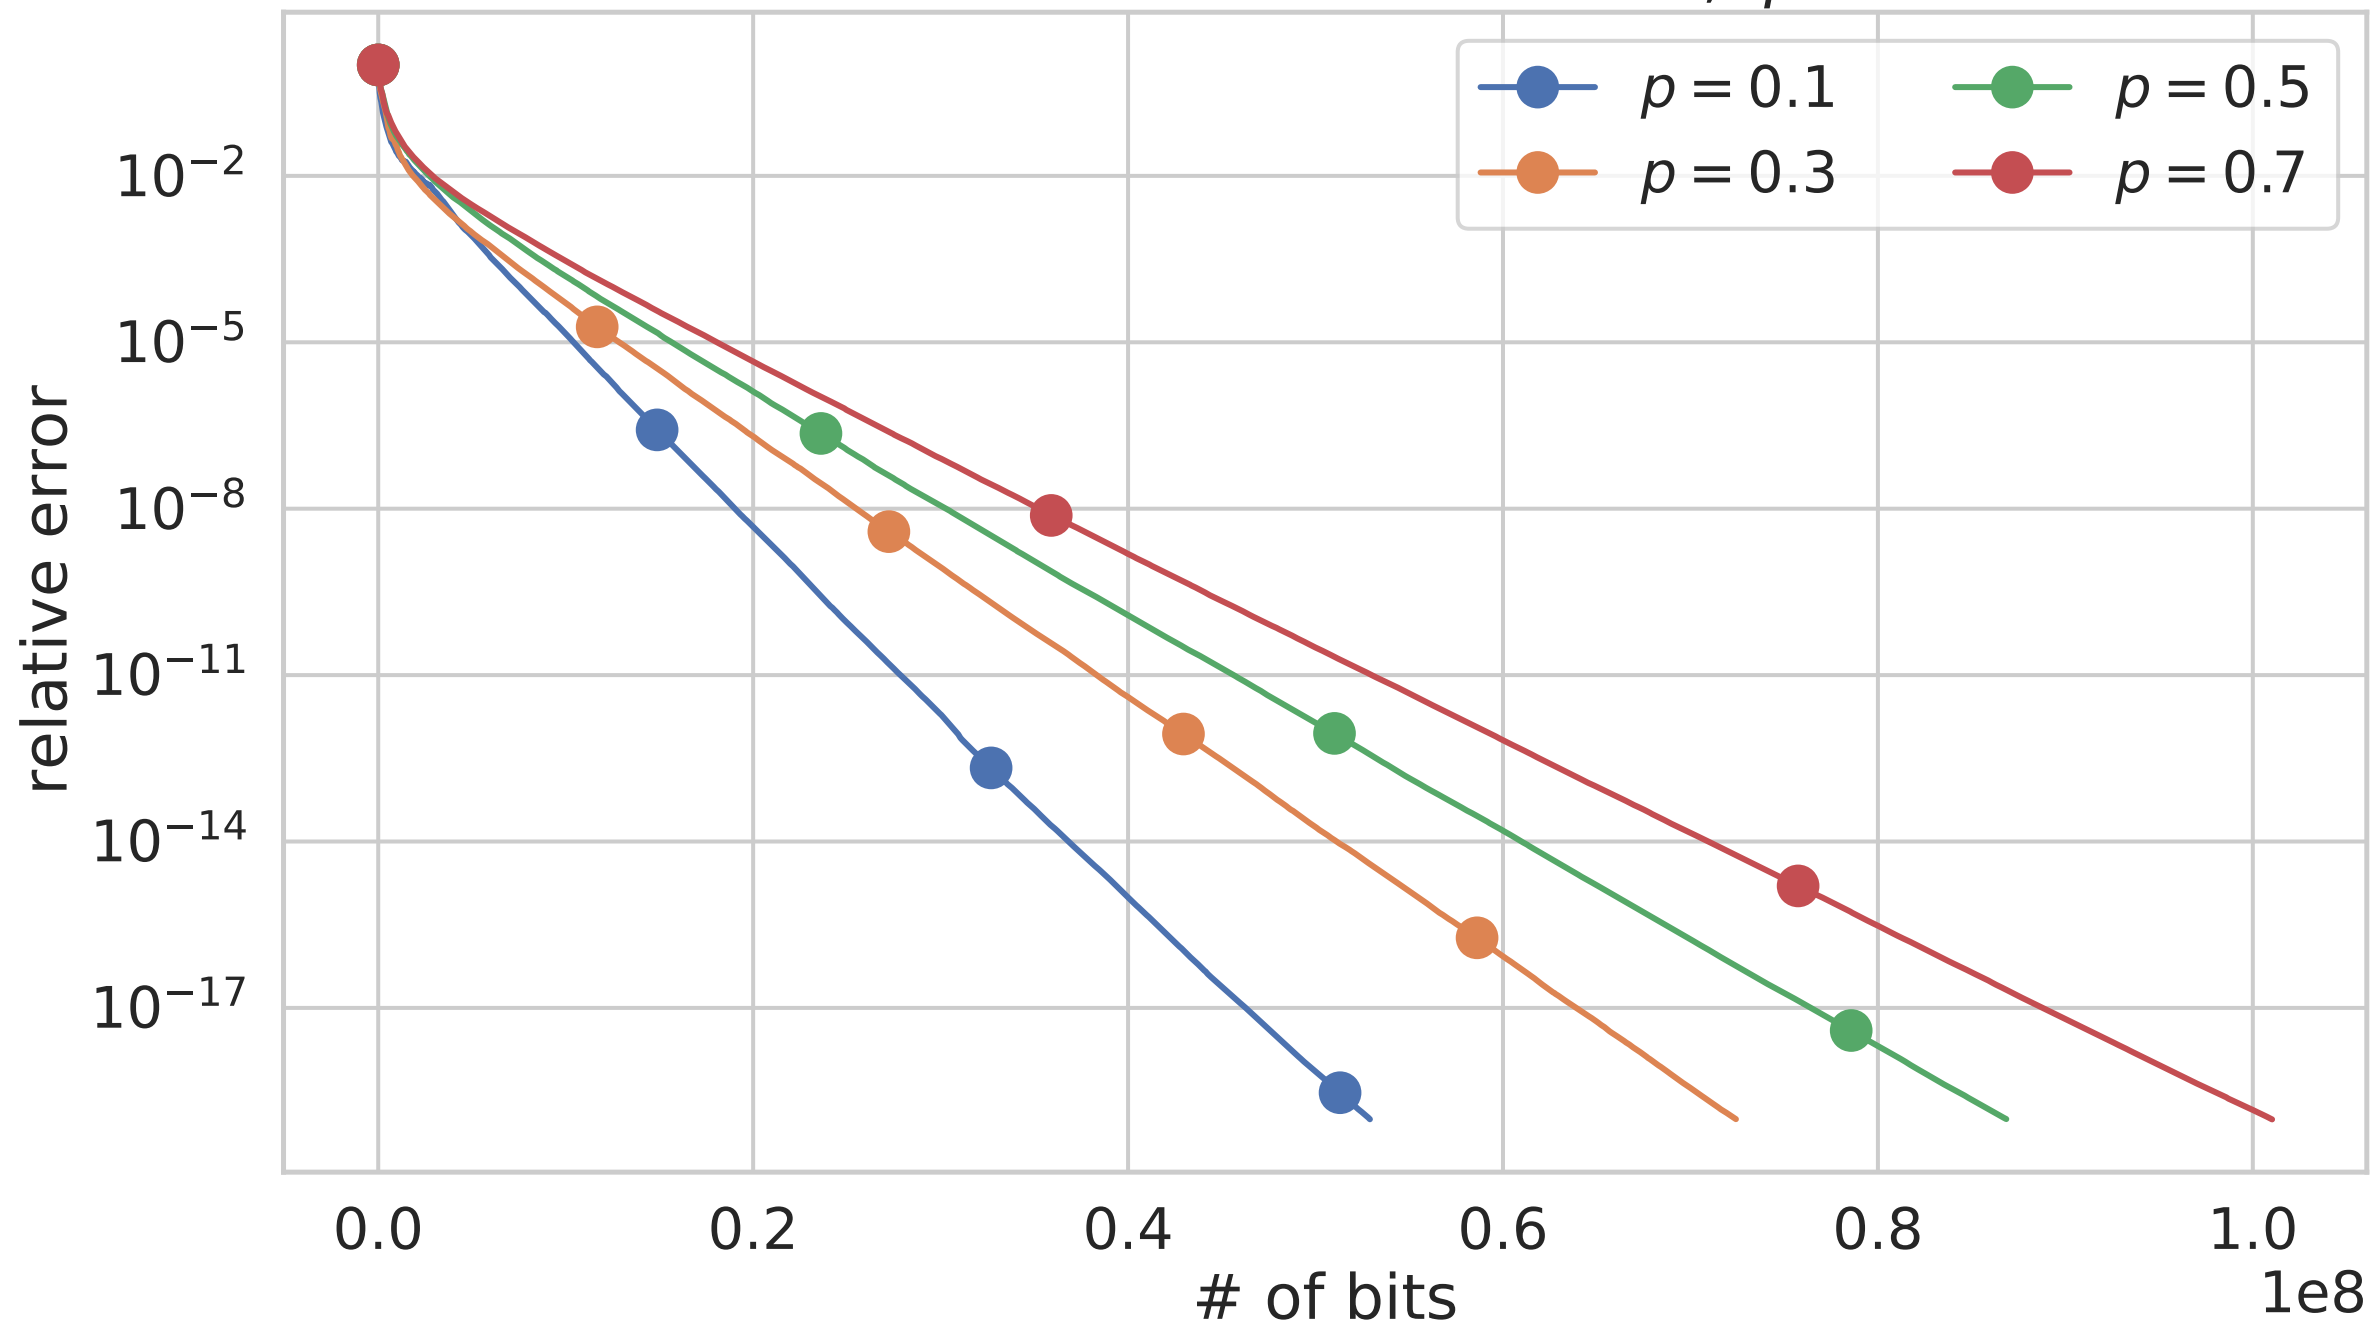

Supplement: supplementary_material [file attachment]

Randomized-DIANA with Rand-K,  $q = 0.1$ 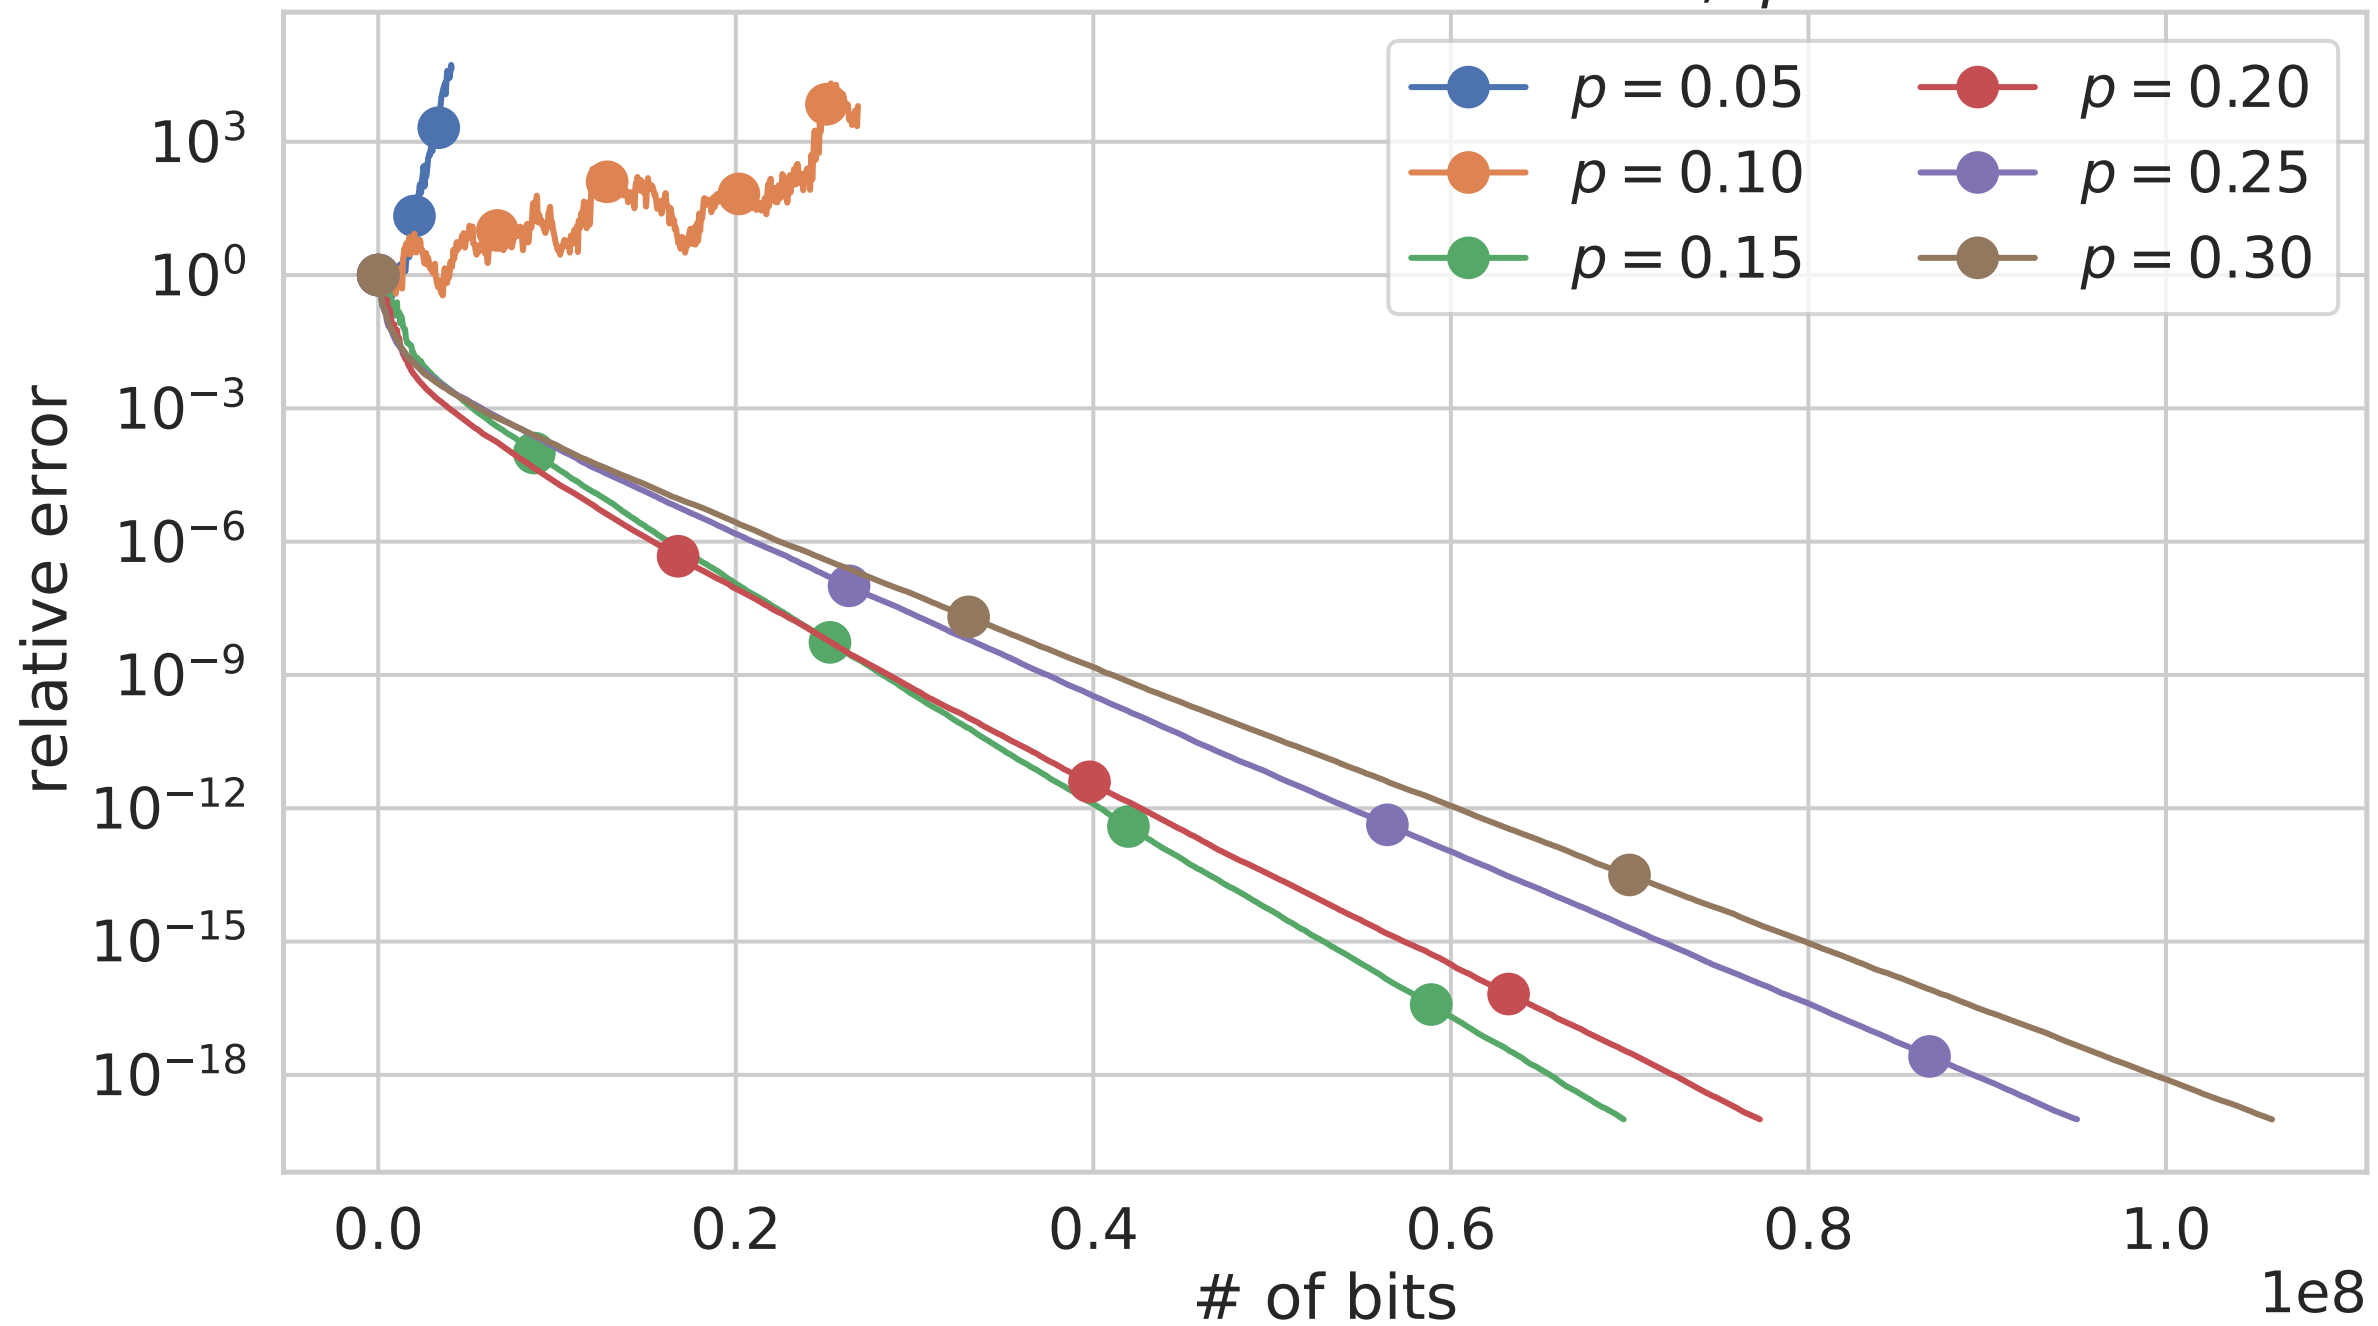

Supplement: supplementary_material [file attachment]

Randomized-DIANA with Rand-K,  $q = 0.3$

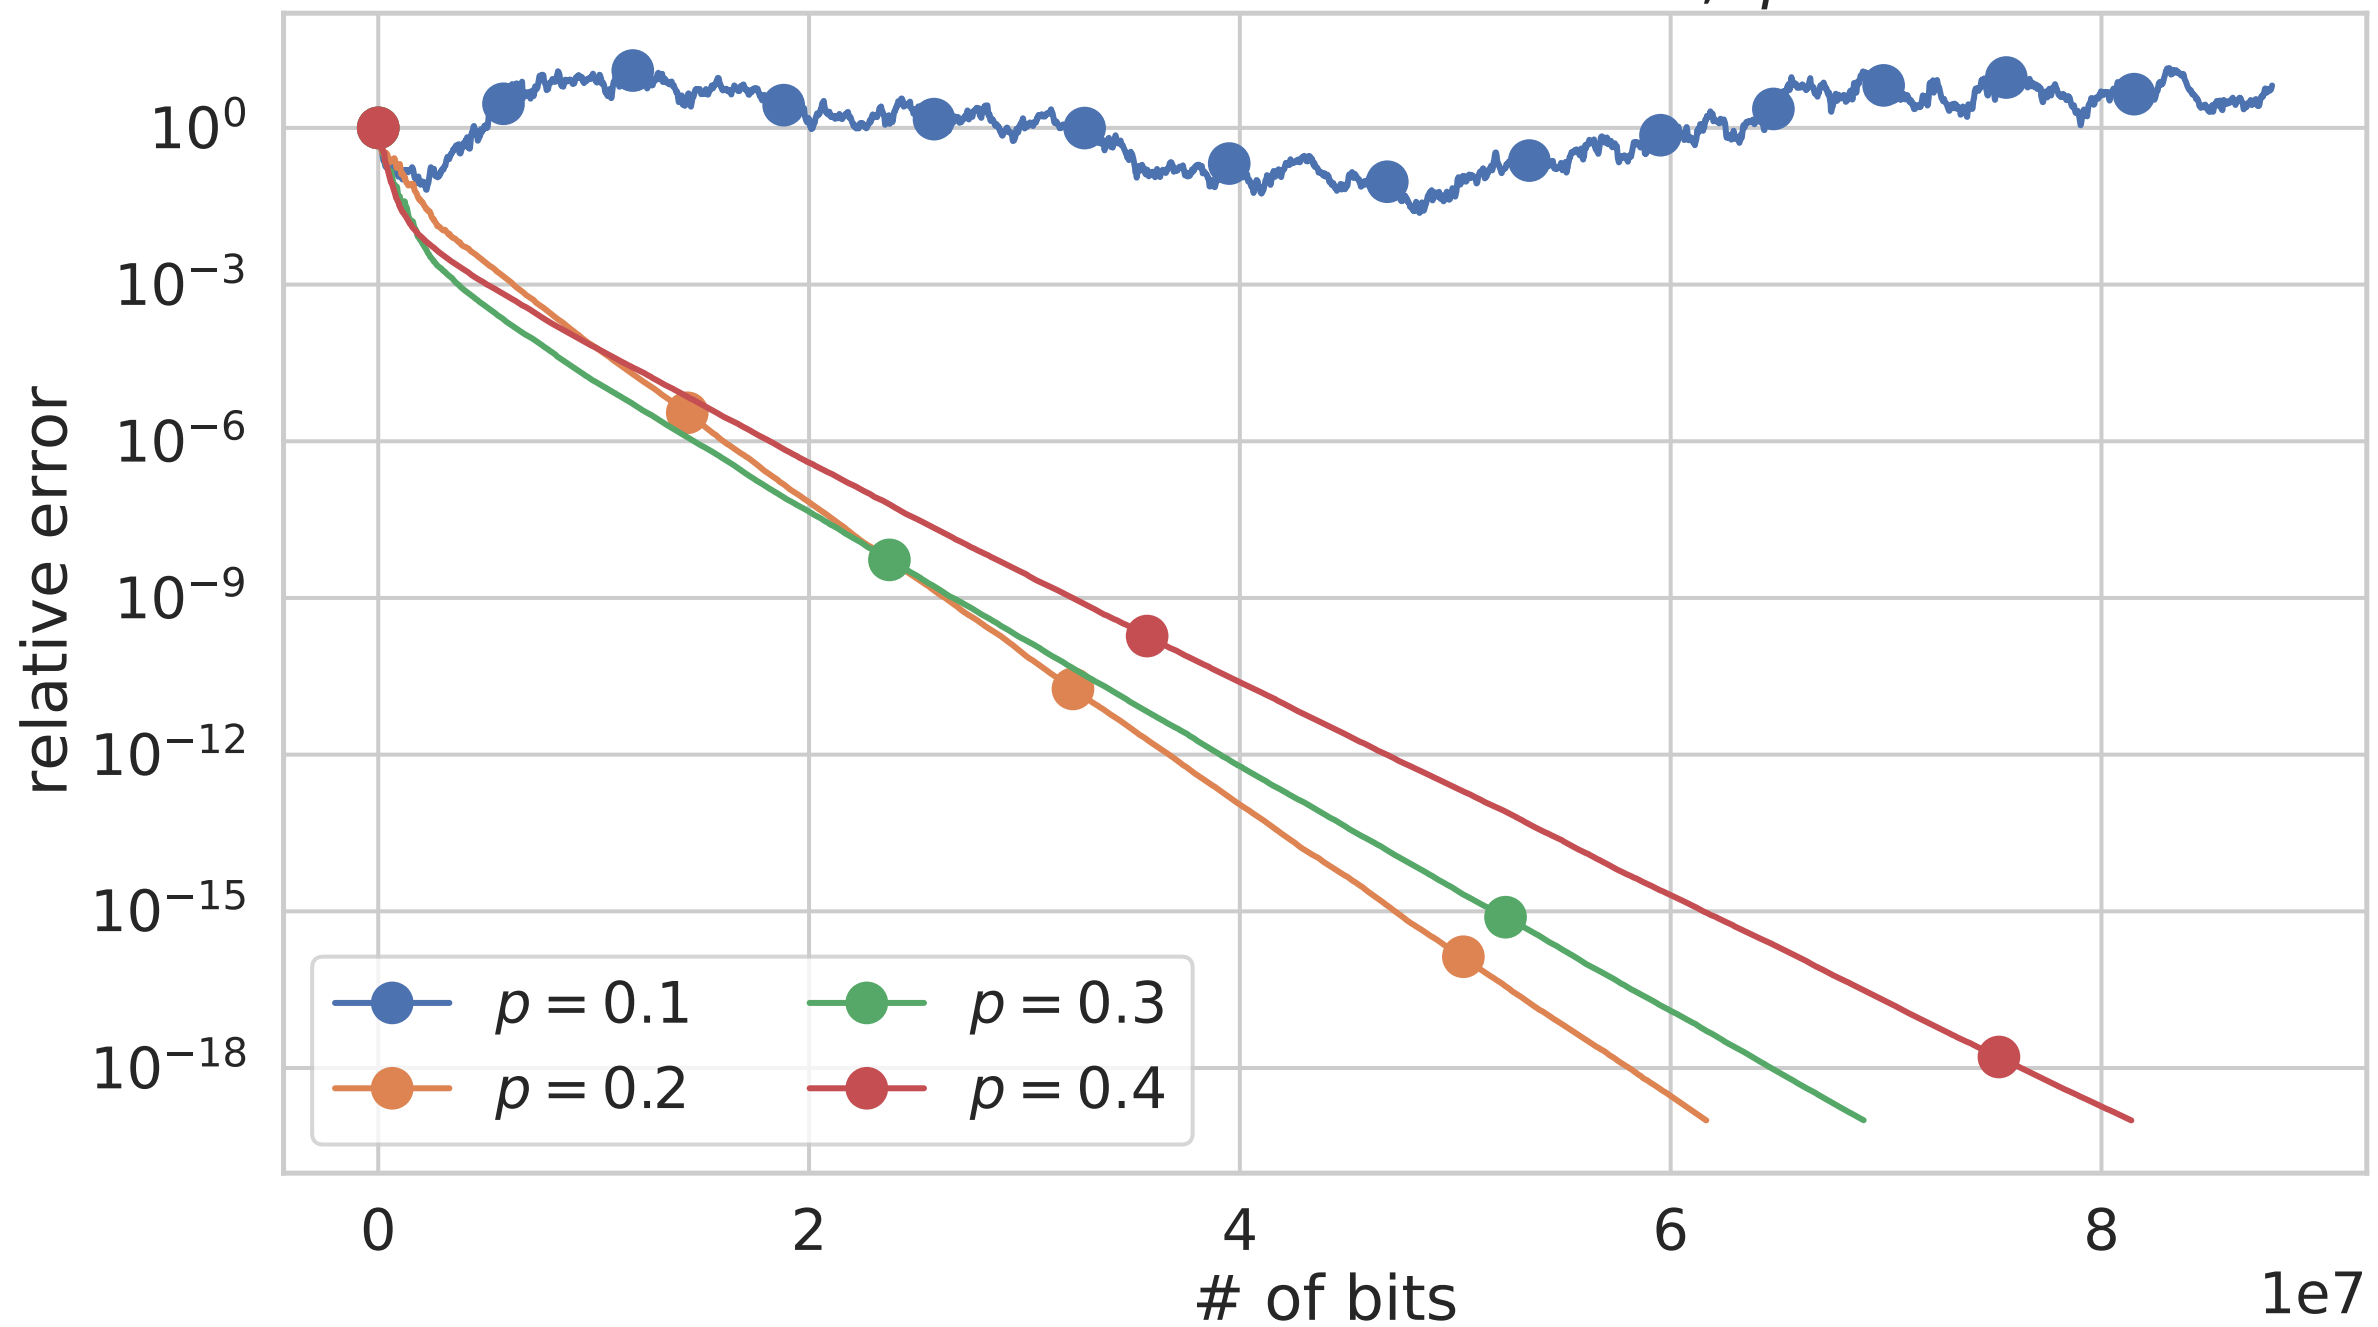

Supplement: supplementary_material [file attachment]

# Natural Dithering

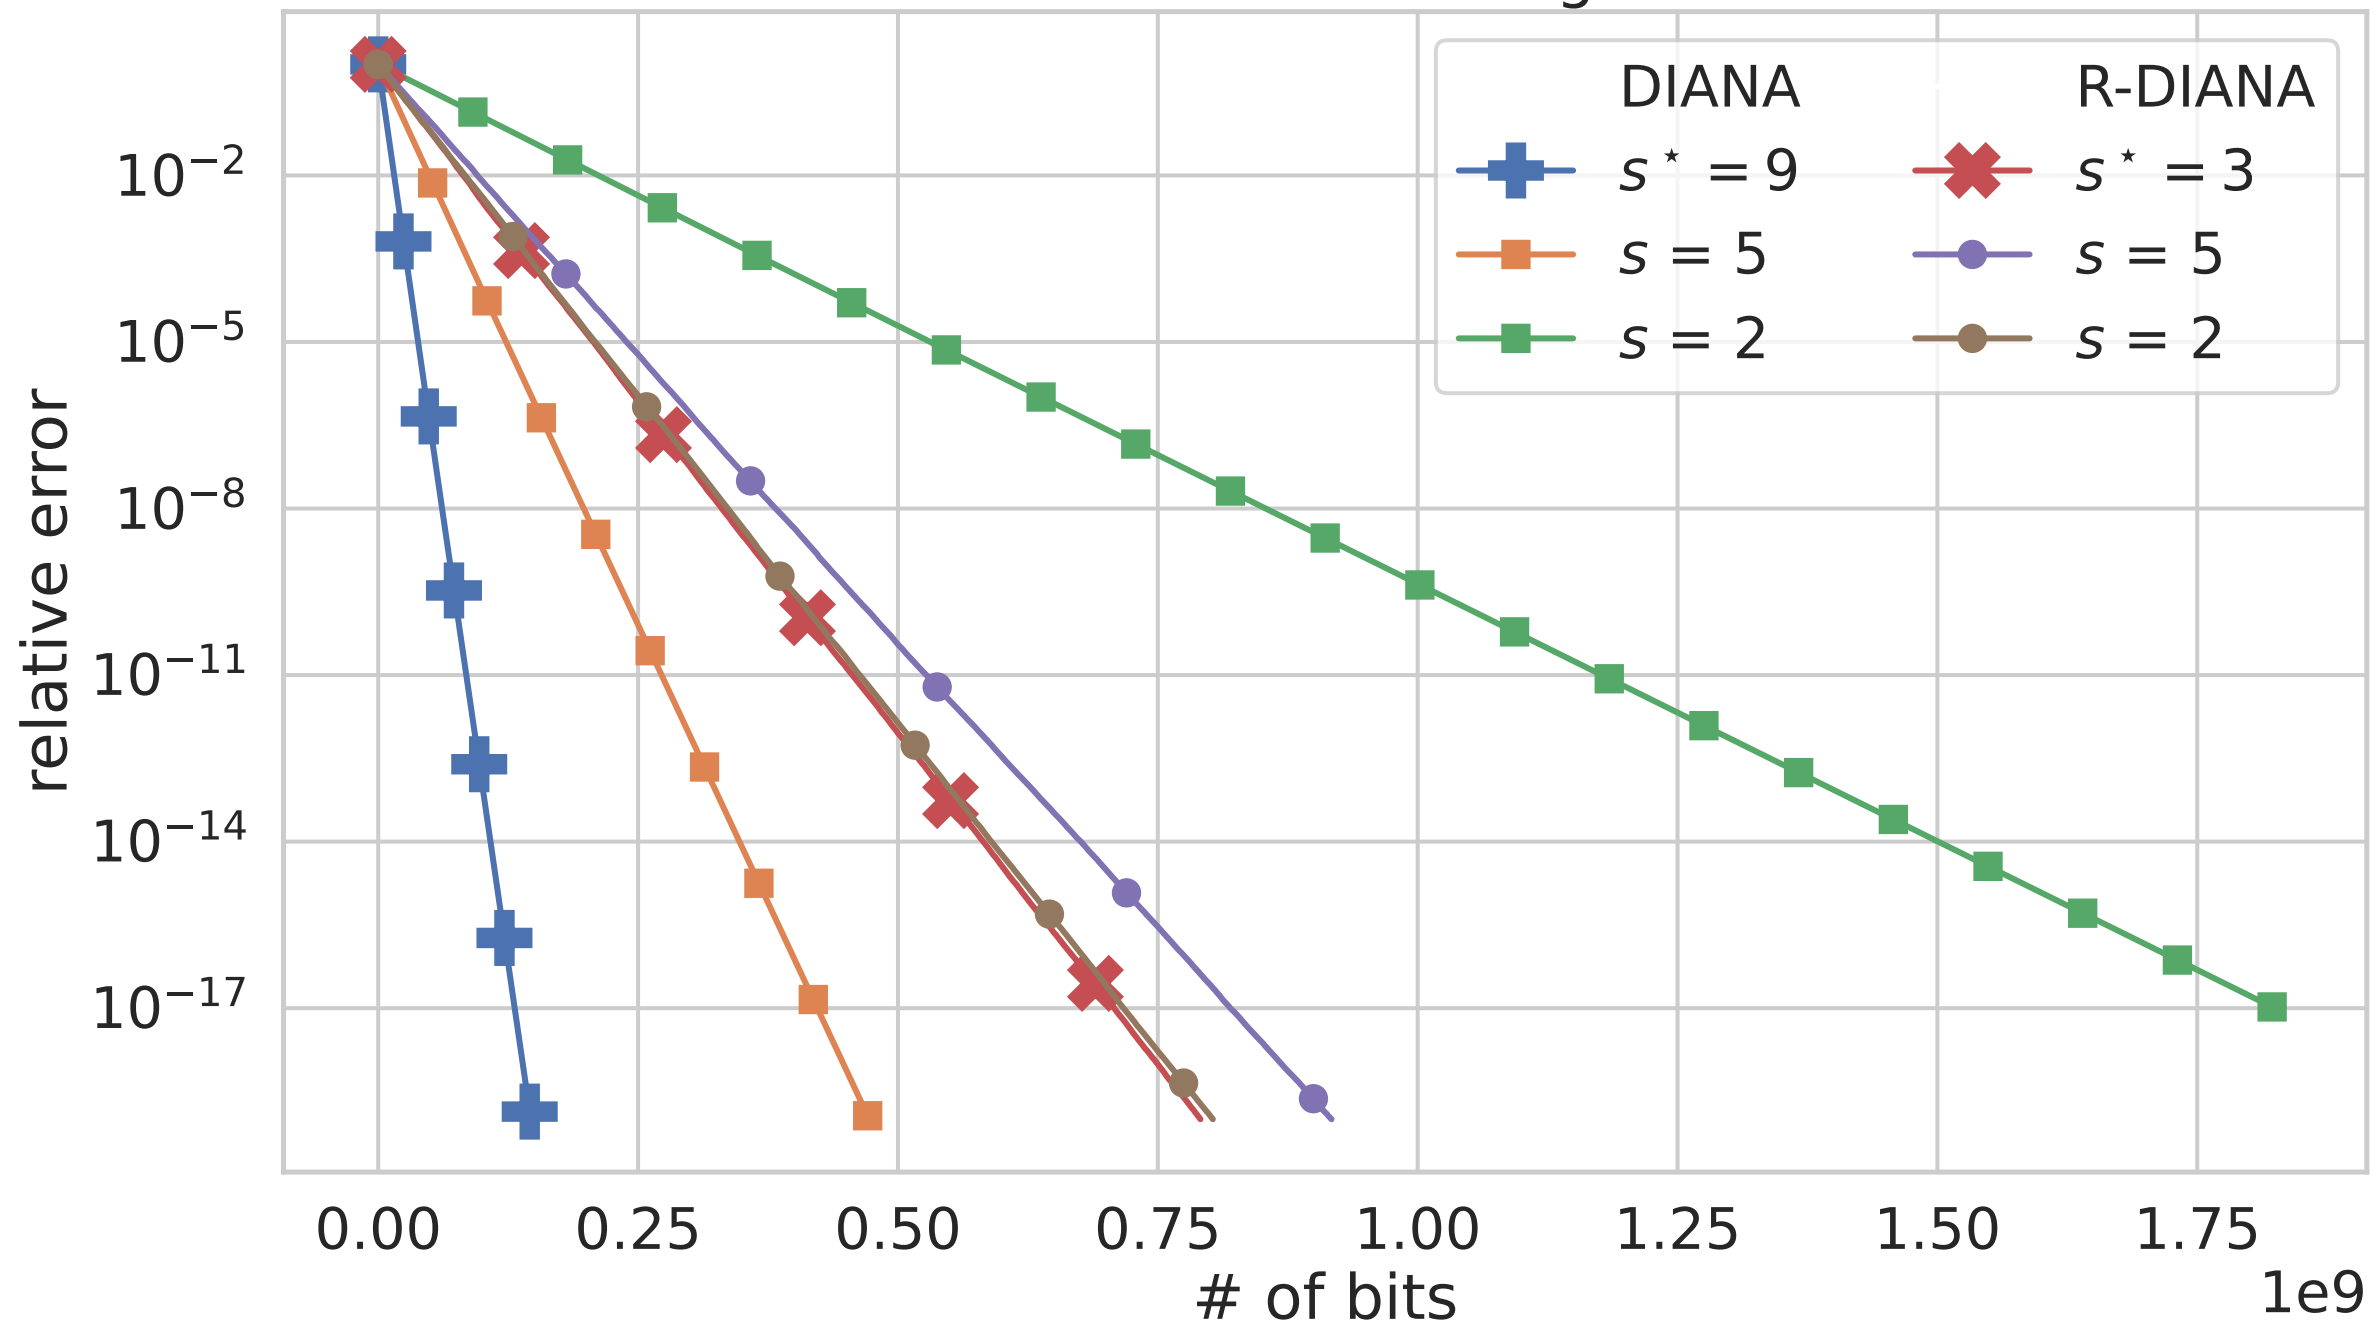

Supplement: supplementary_material [file attachment]
